# Supplementary material for: 3-Substituted biquinolinium inhibitors of AraC family transcriptional activator VirF from S. flexneri obtained through in situ chemical ionization of 3,4-disubstituted dihydroquinolines
Source: Royal Society of Chemistry journal article supplement (doi:10.1039/c4ra08384a), 2014-08-18

### NMR data for quaternary salts

#### 1'-butyl-[2,3'-biquinolin]-1'-ium bromide (2)

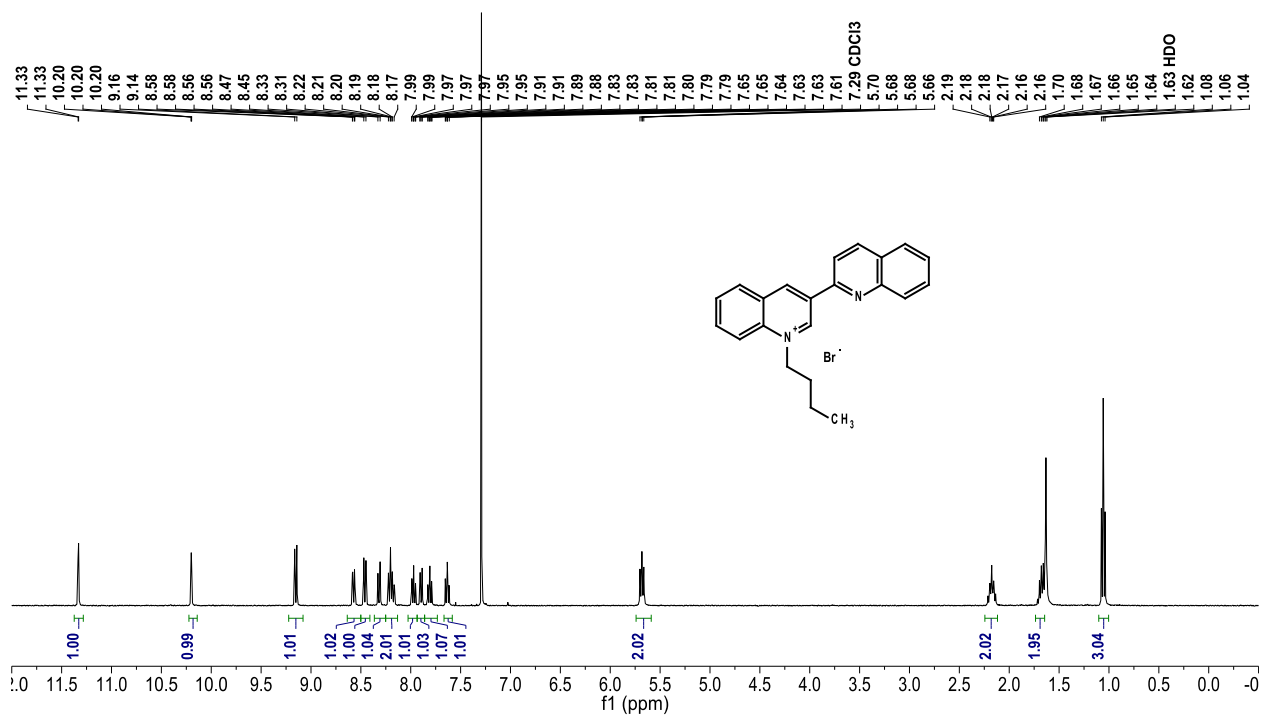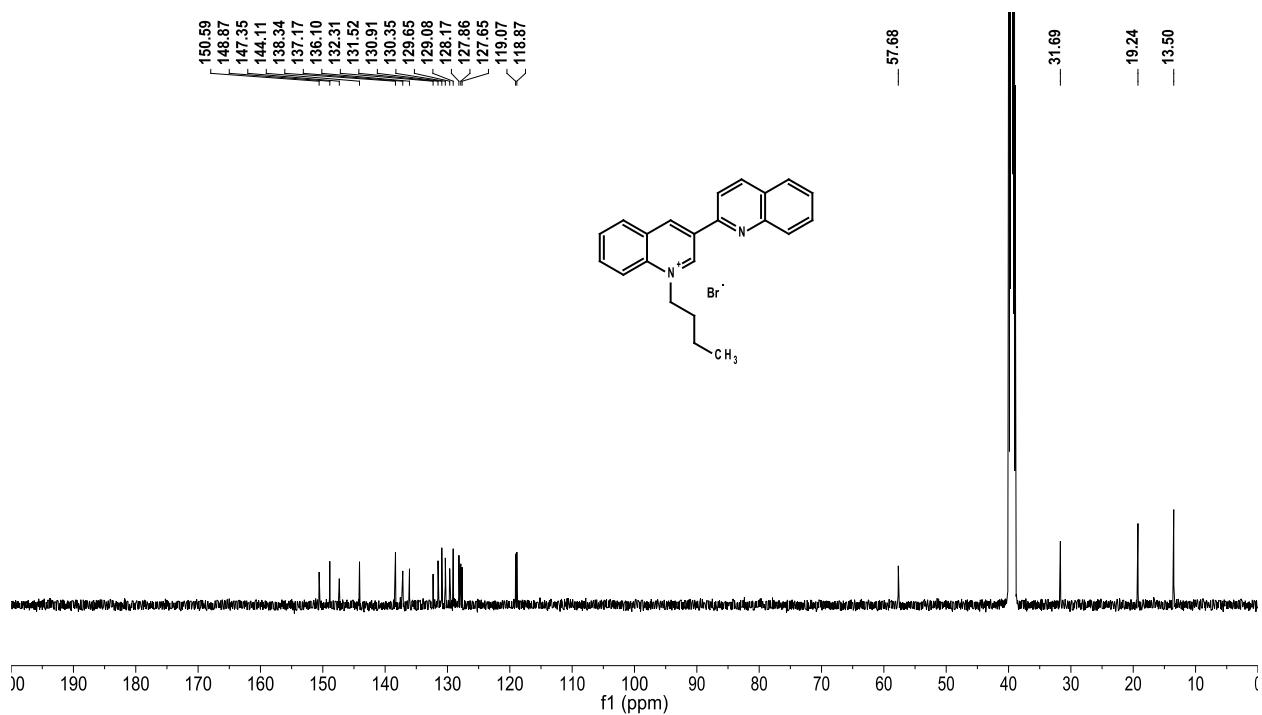

# 1'-(4-chlorobenzyl)-[2,3'-biquinolin]-1'-ium bromide (3)

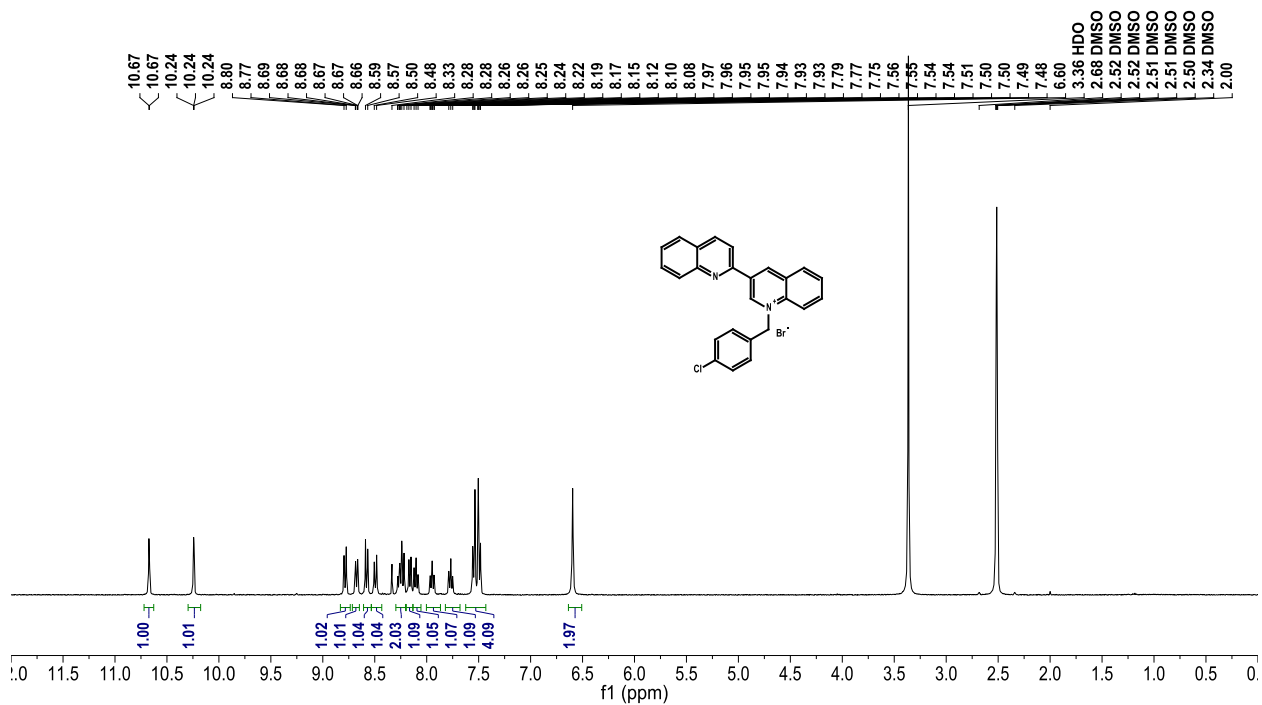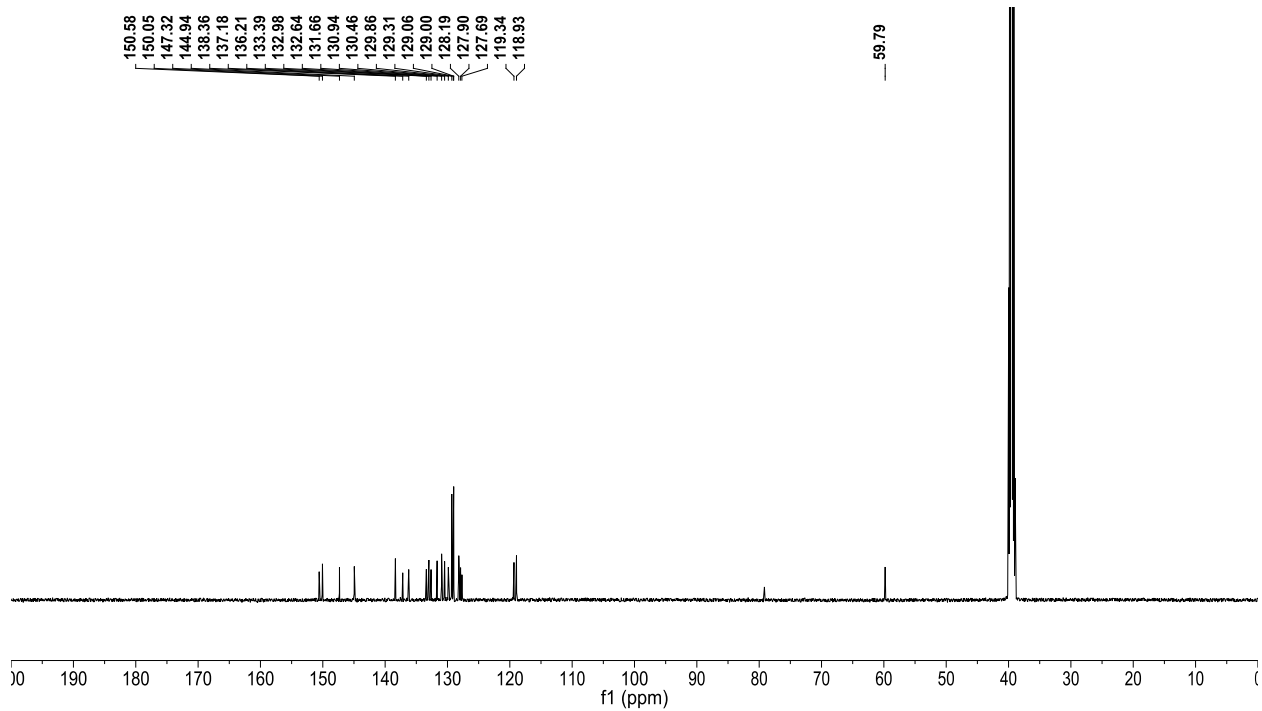

# 1'-methyl-[2,3'-biquinolin]-1'-ium iodide (4)

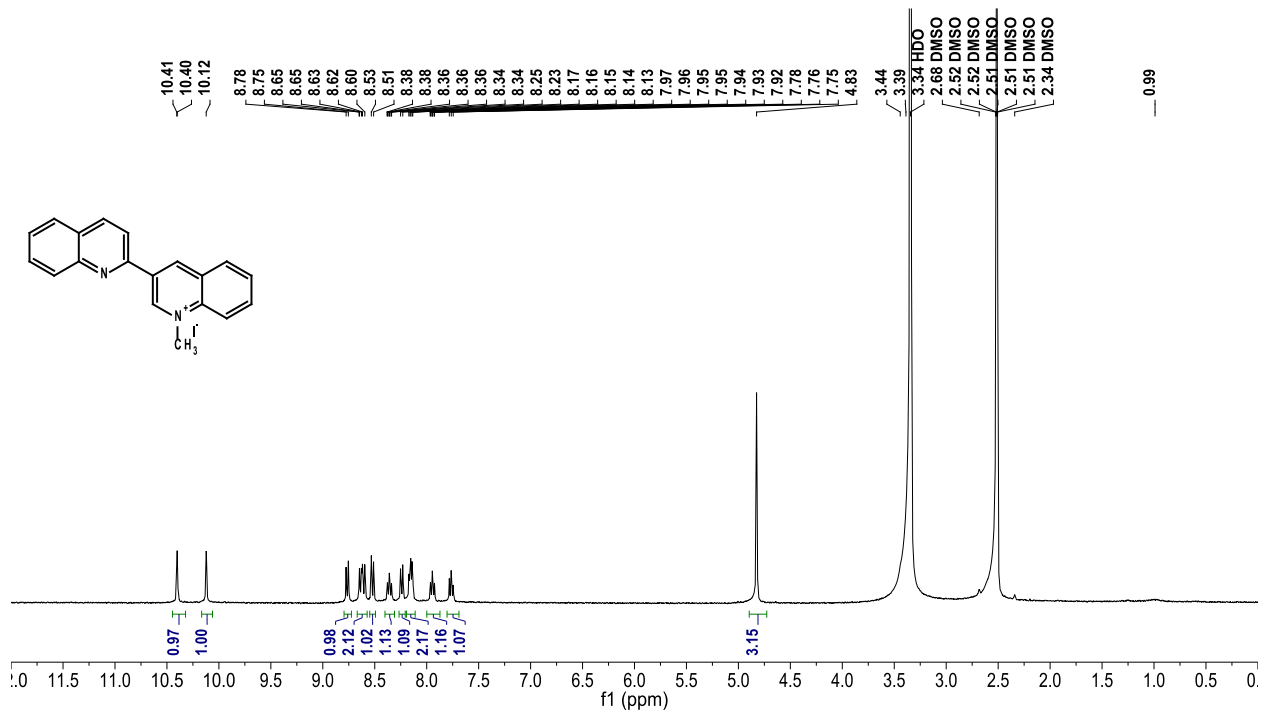

# 1-butyl-3-(3-chlorophenyl)quinolin-1-ium bromide (extra analog)

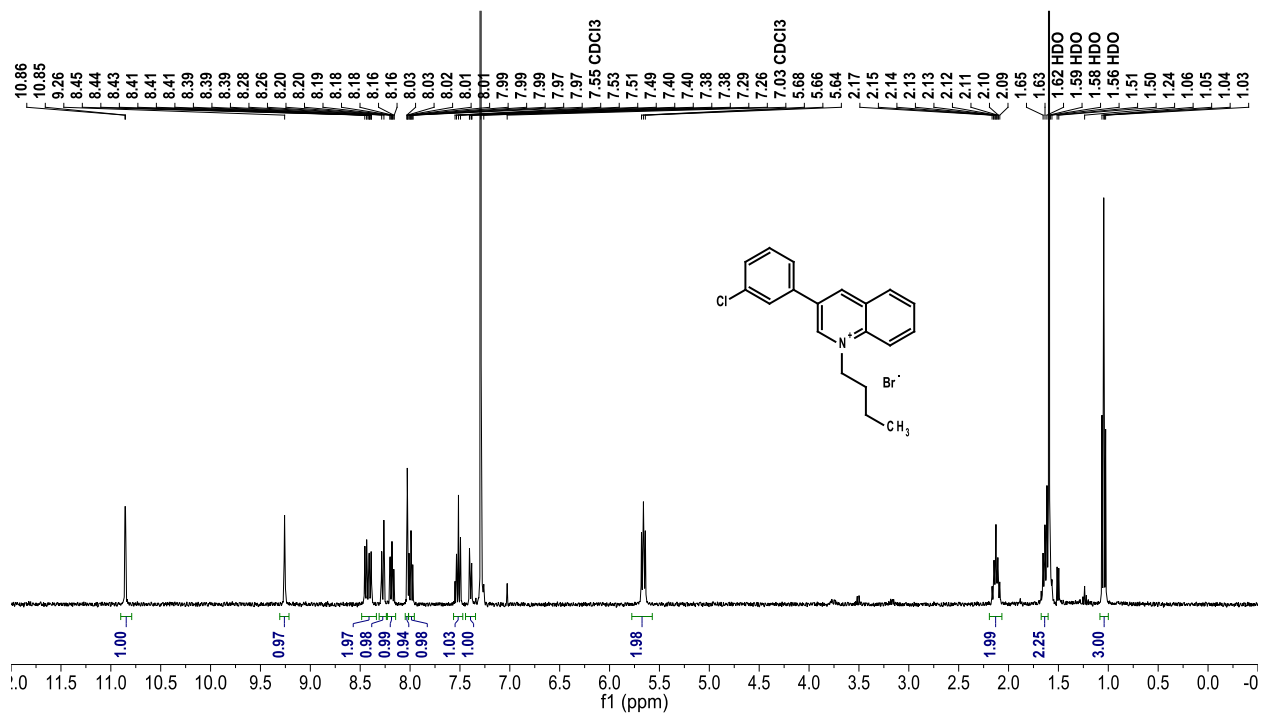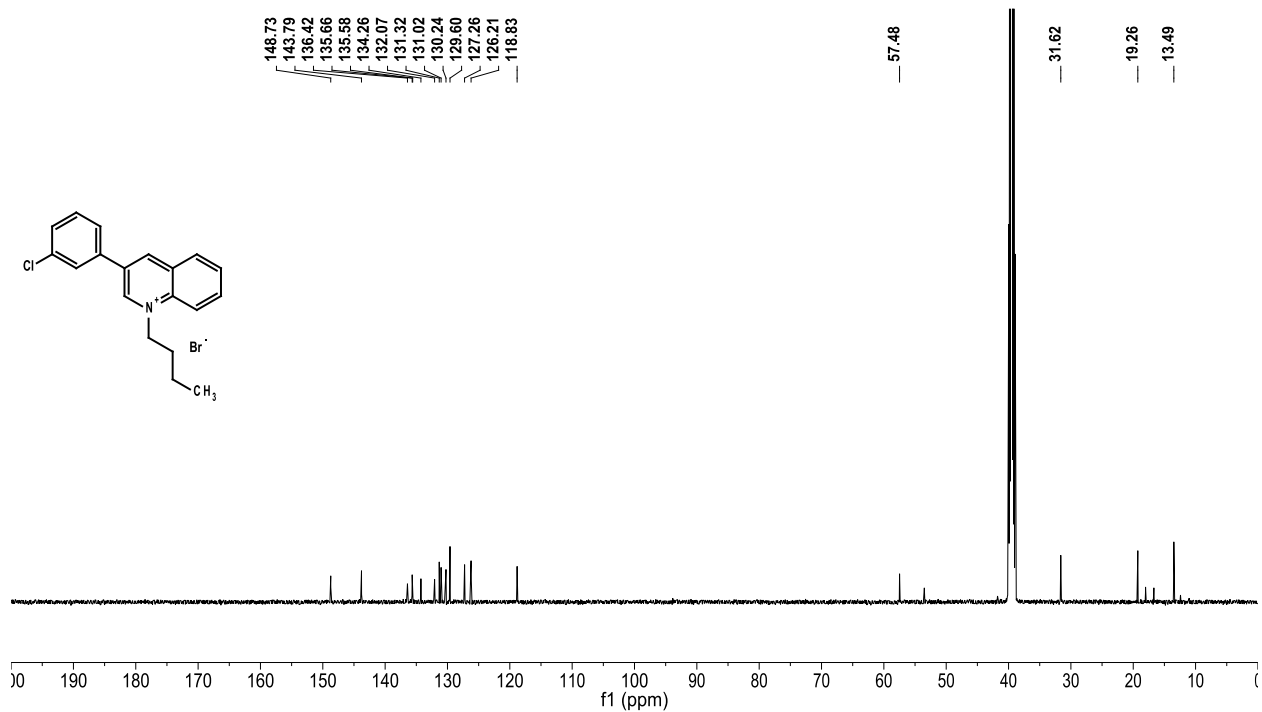

# 1-(4-chlorobenzyl)-3-(6-methylpyridin-2-yl)quinolin-1-ium bromide (extra analog)

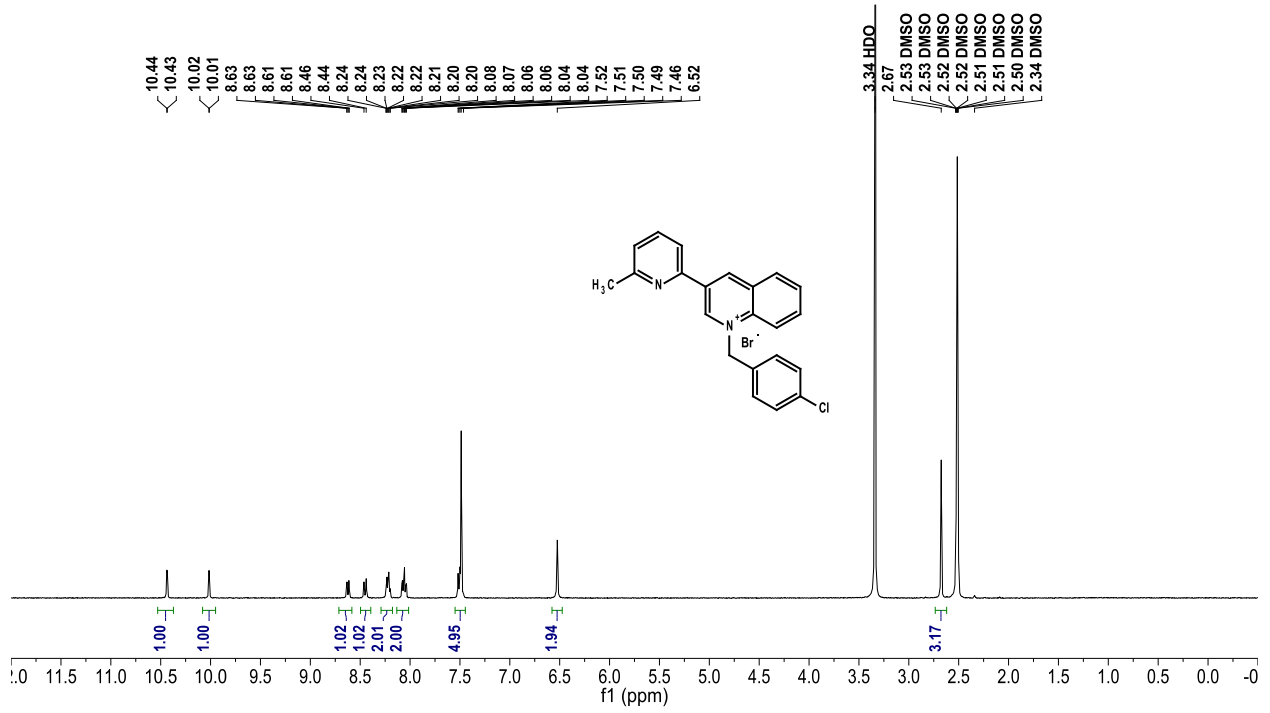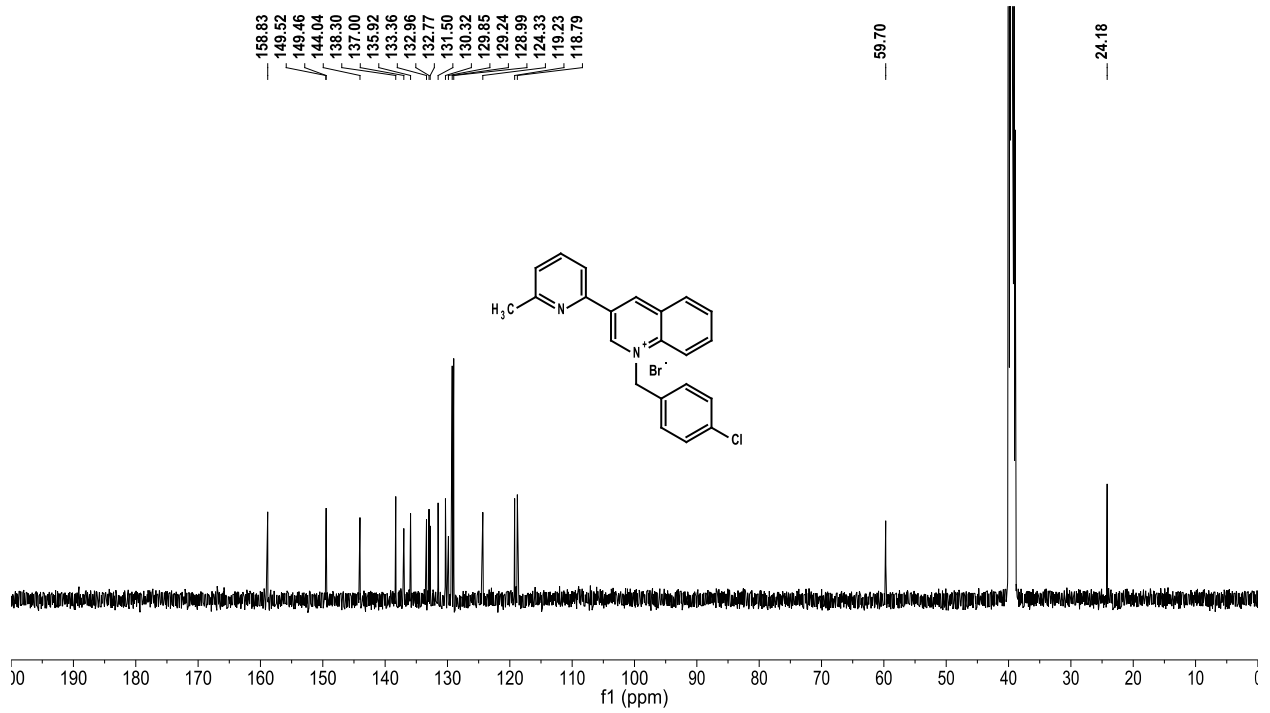

# 1-(4-chlorobenzyl)-3-(3-chlorophenyl)quinolin-1-ium bromide (extra analog)

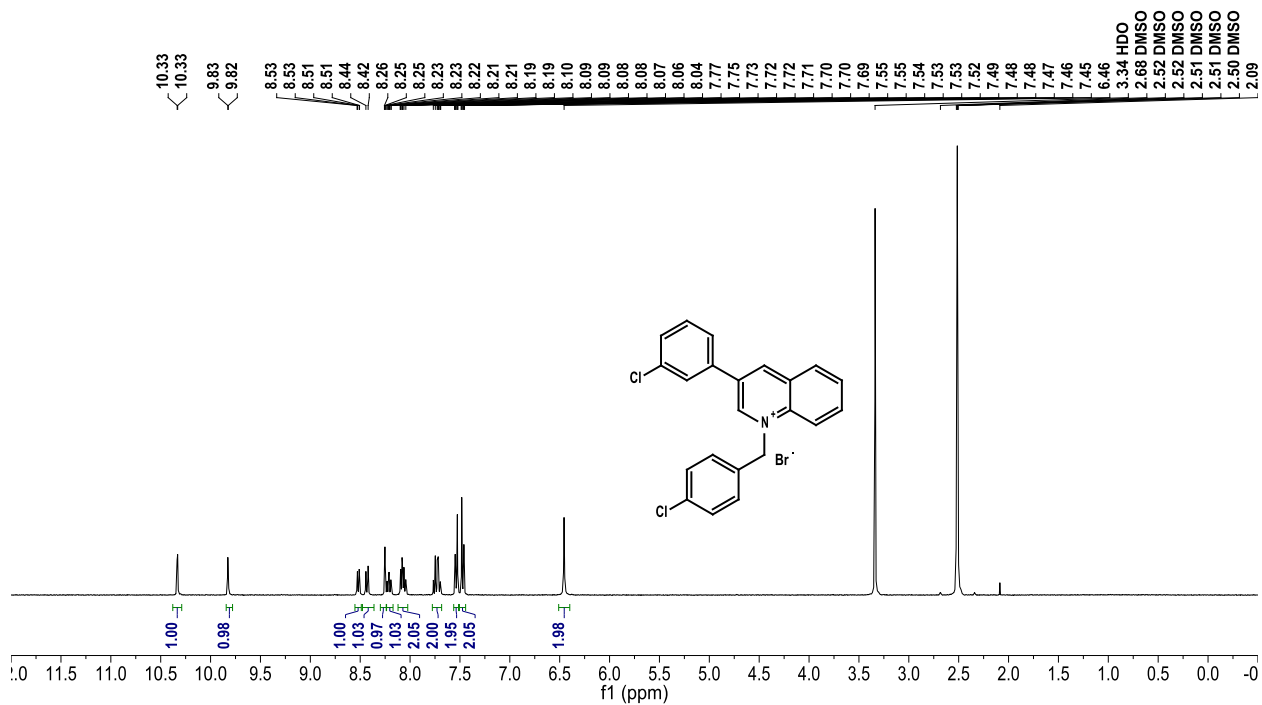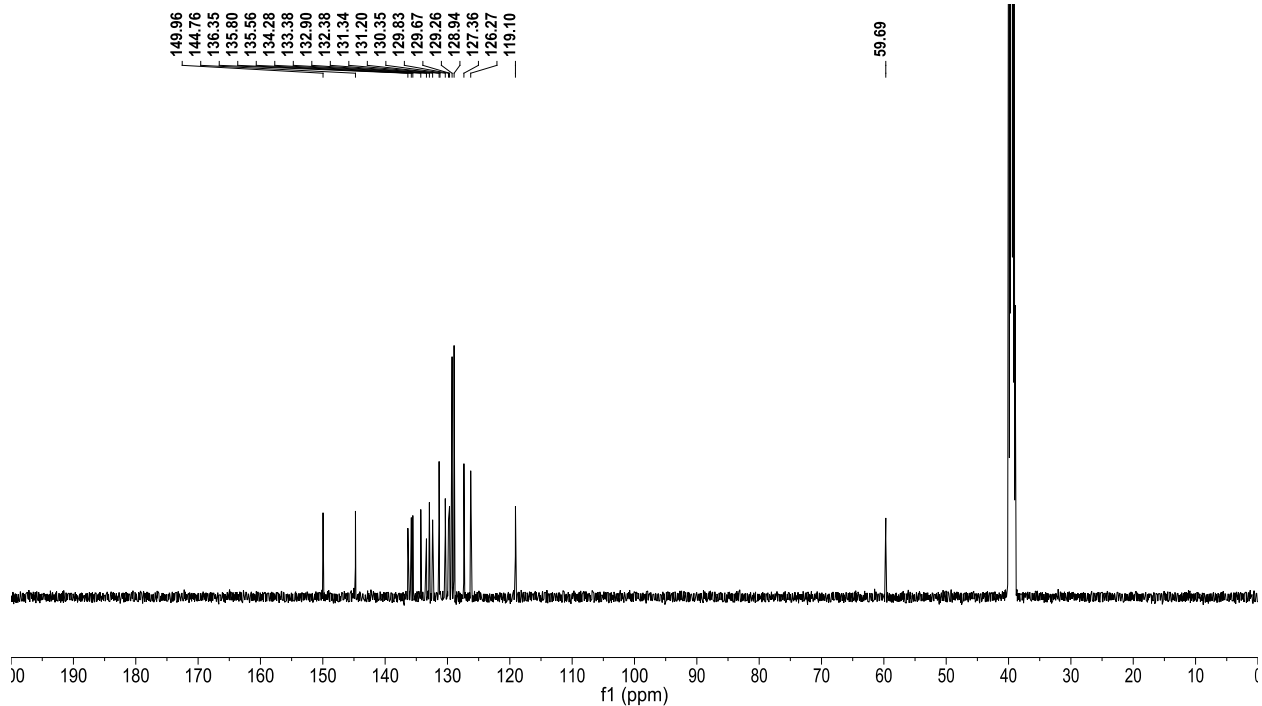

# 1--Nonylpyridin-1-ium bromide (17)

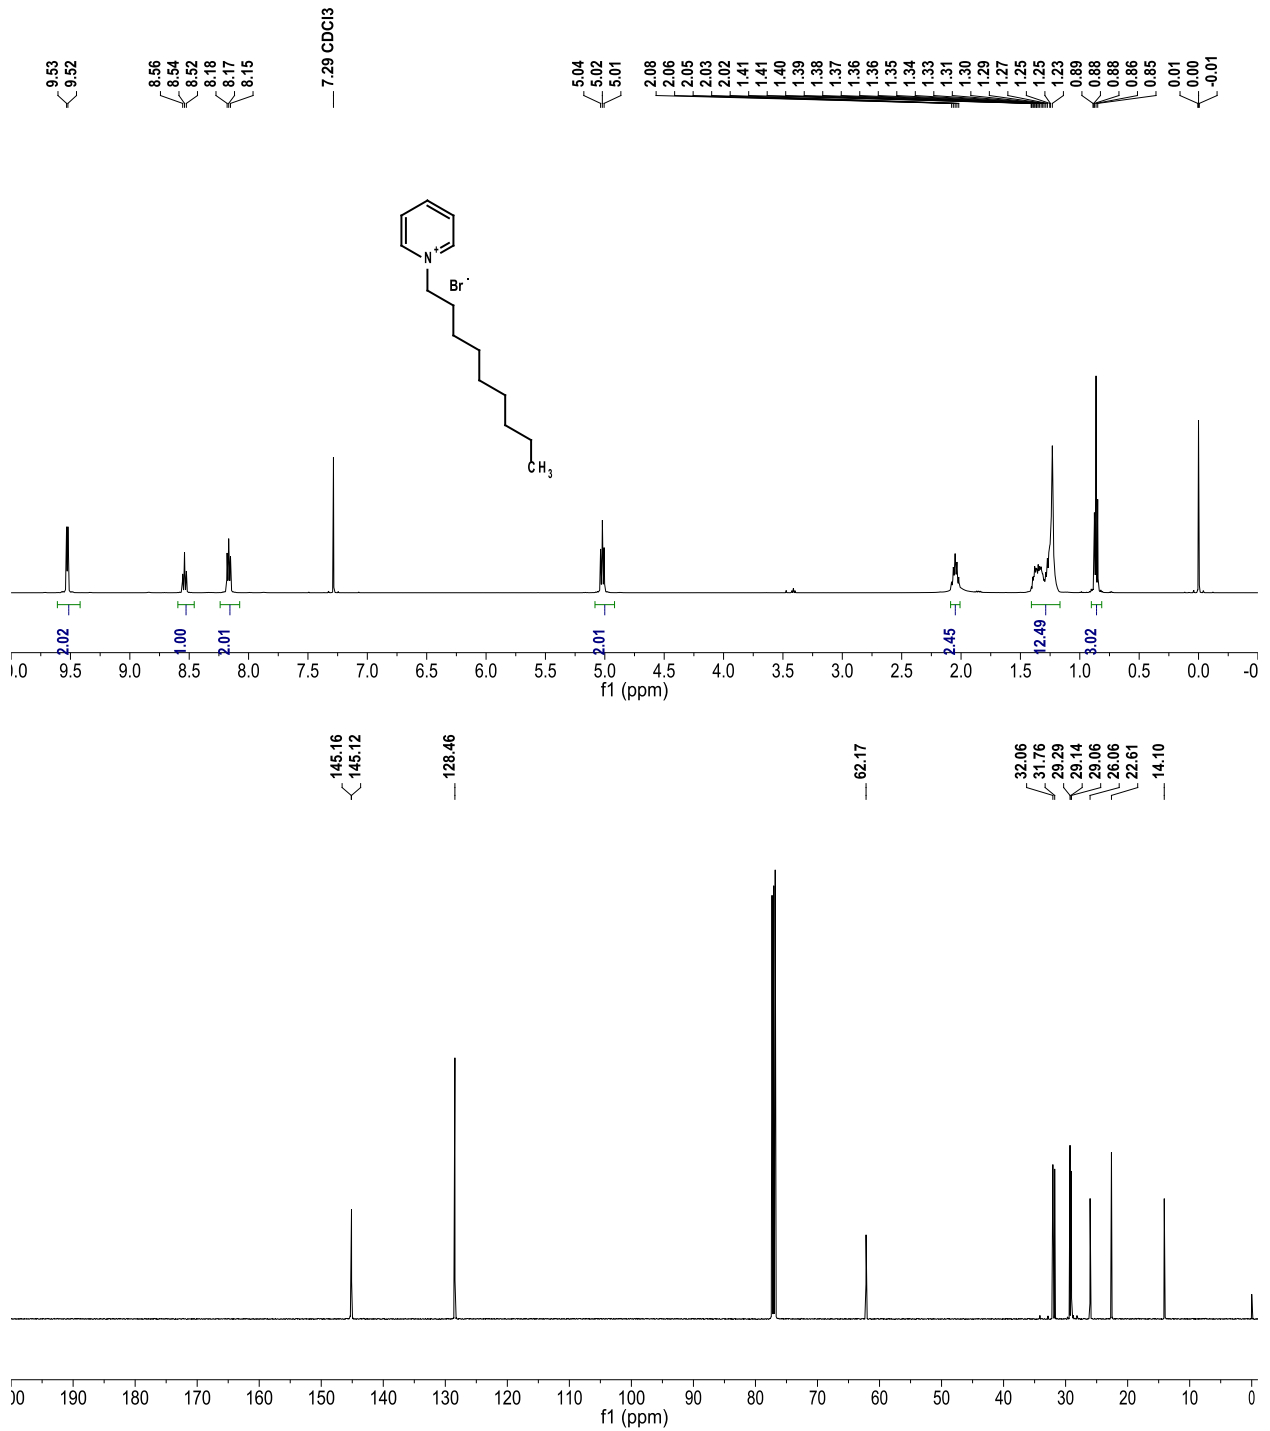

# N,N,N-triethylnonan-1-aminium bromide (18)

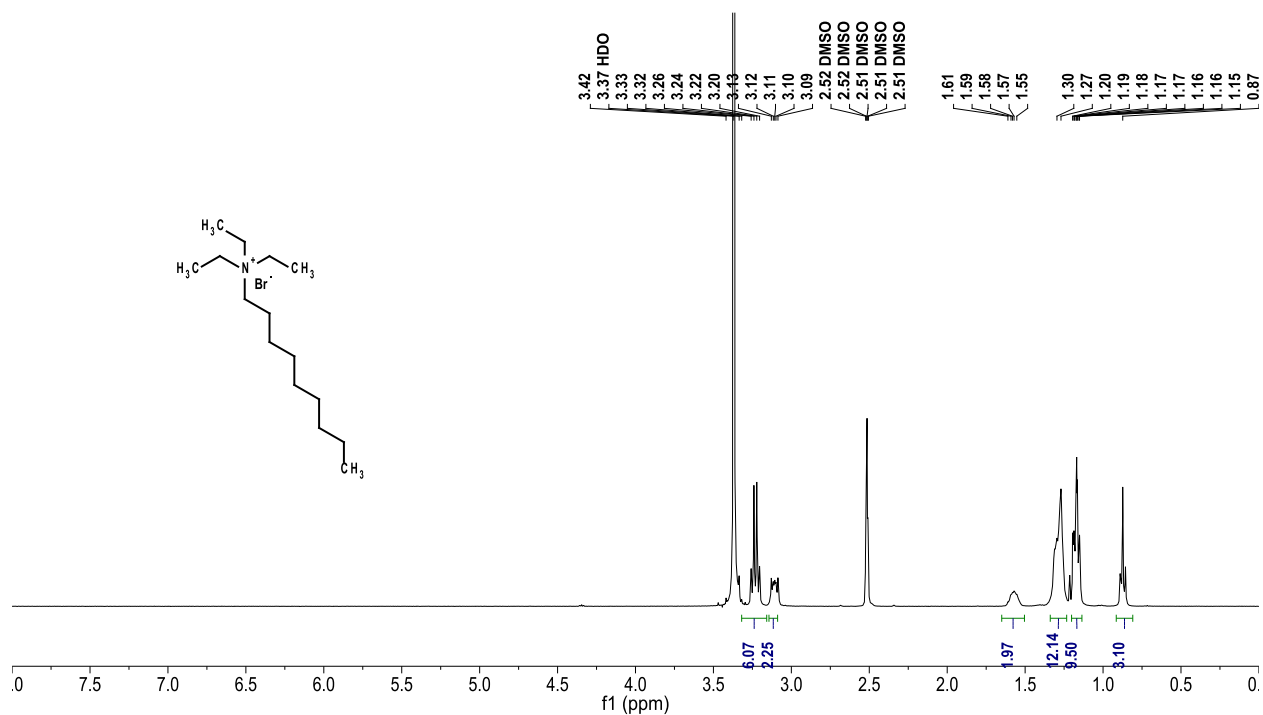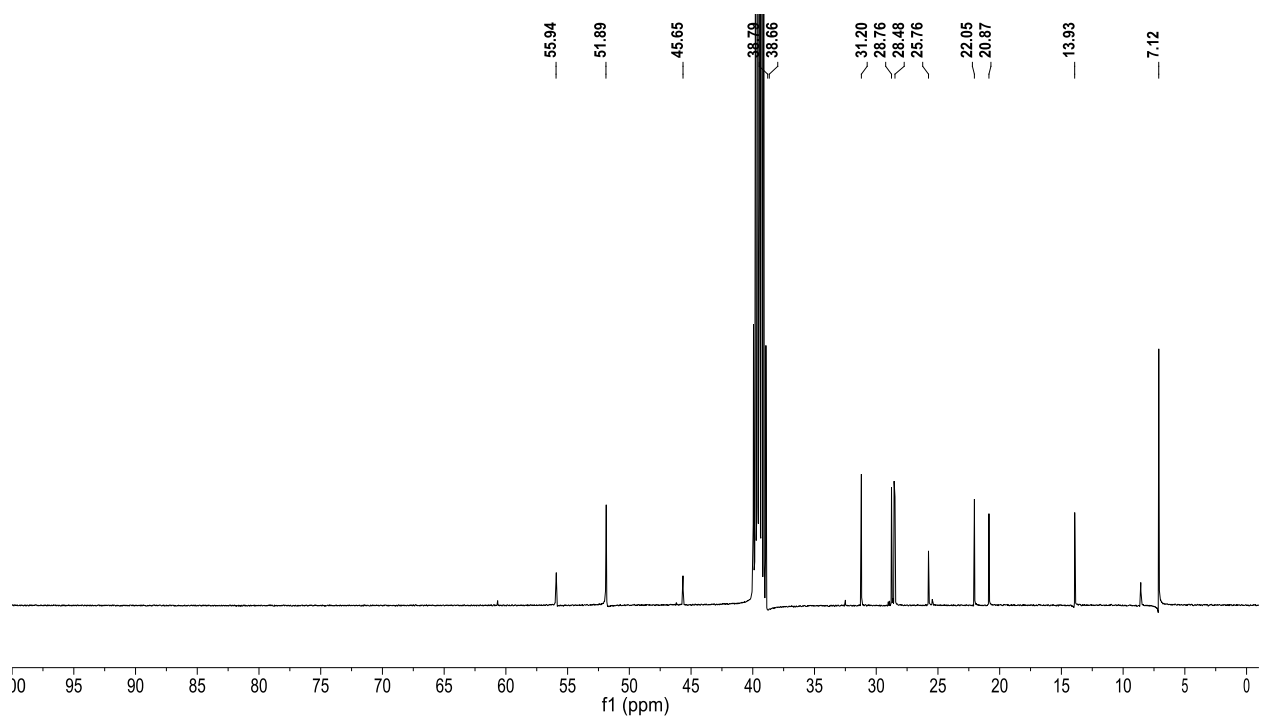



# 1'-isopropyl-[2,3'-biquinolin]-1'-ium iodide (19)

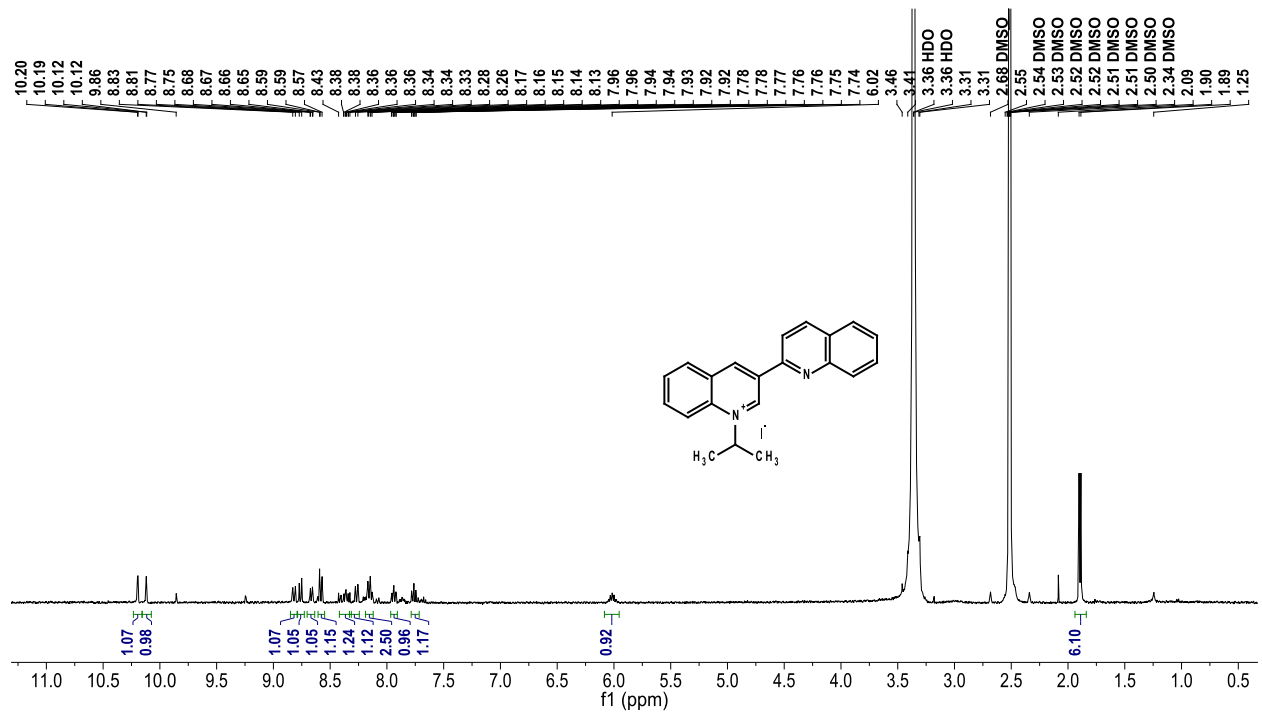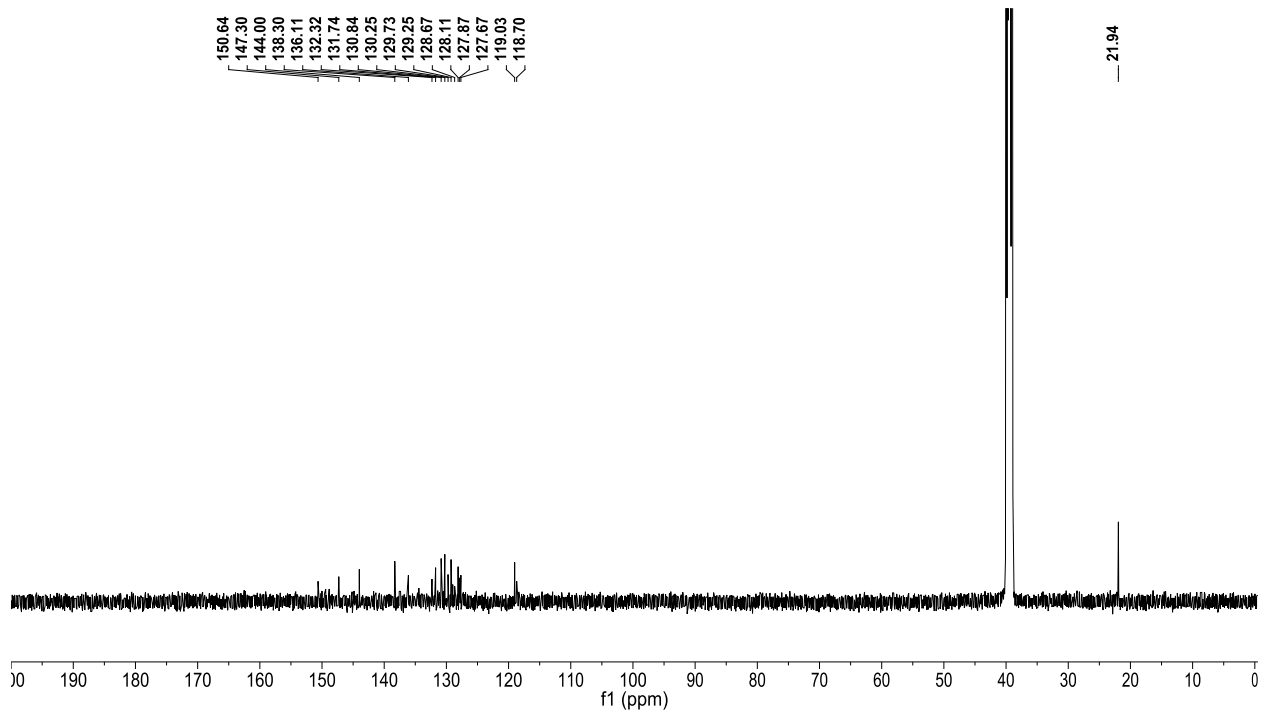

# 1'-propyl-[2,3'-biquinolin]-1'-ium bromide (20)

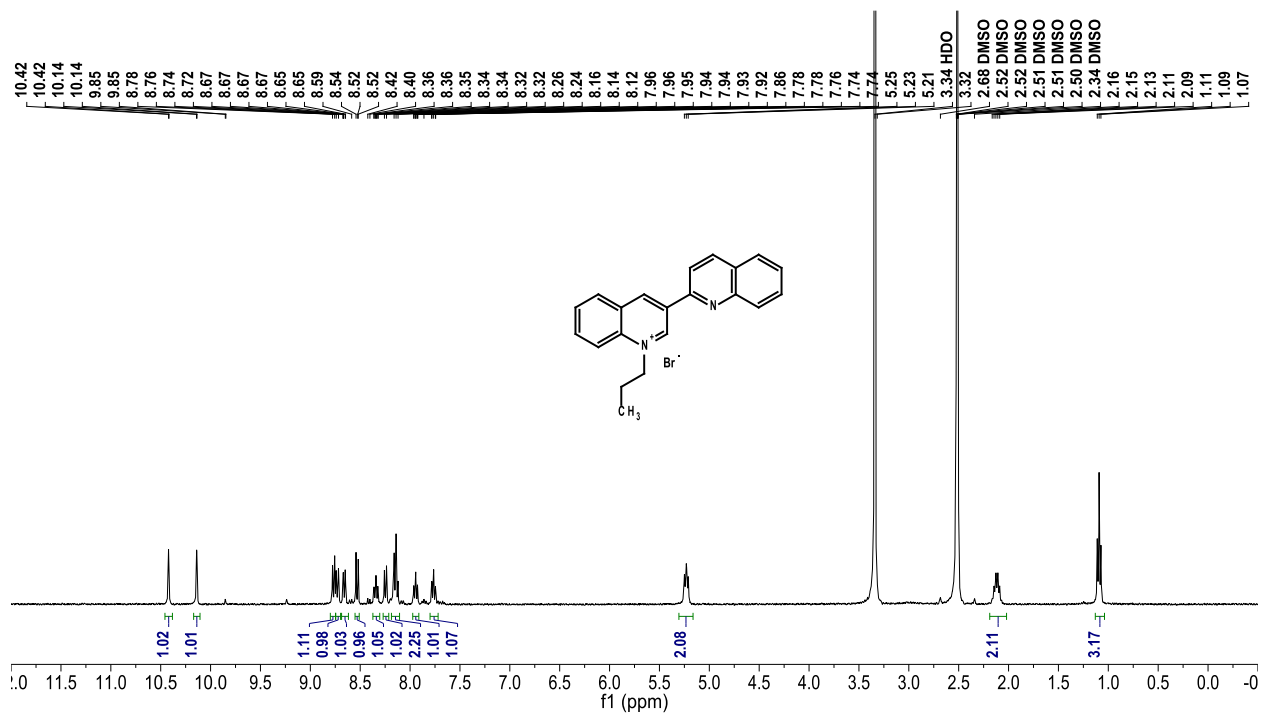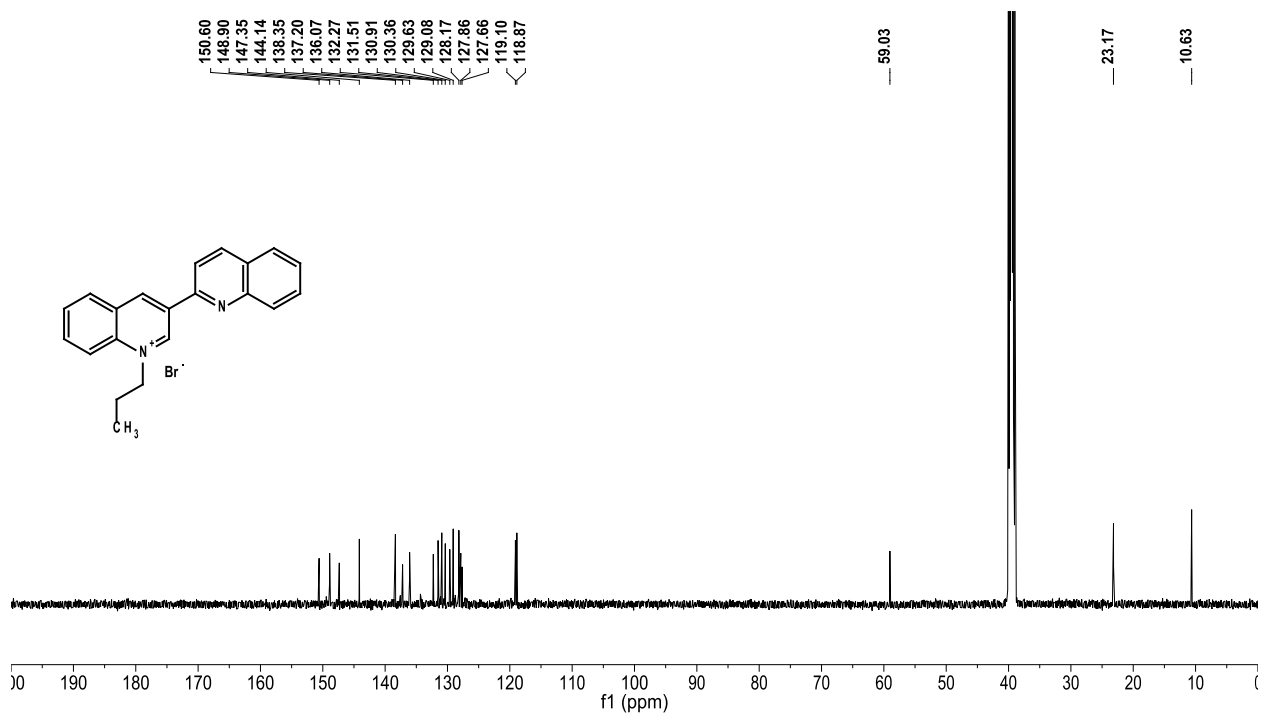

# 1'-hexyl-[2,3'-biquinolin]-1'-ium bromide (21)

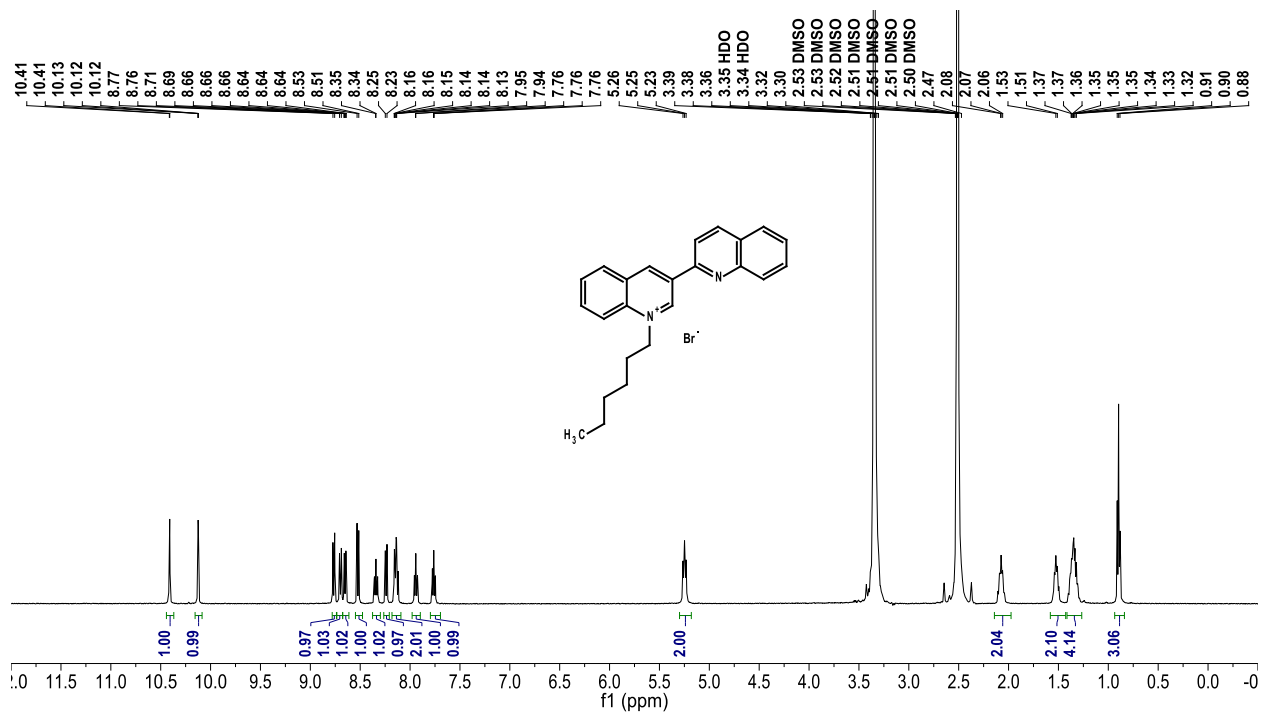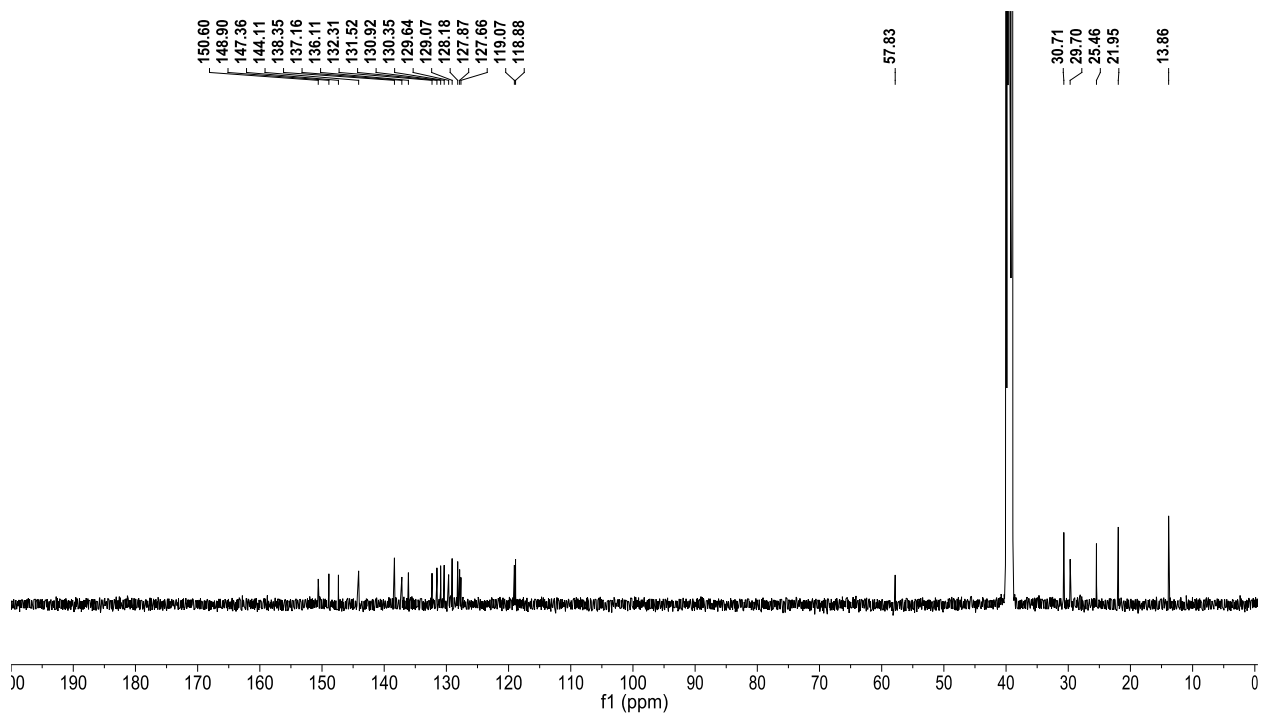

# 1'-nonyl-[2,3'-biquinolin]-1'-ium bromide (22)

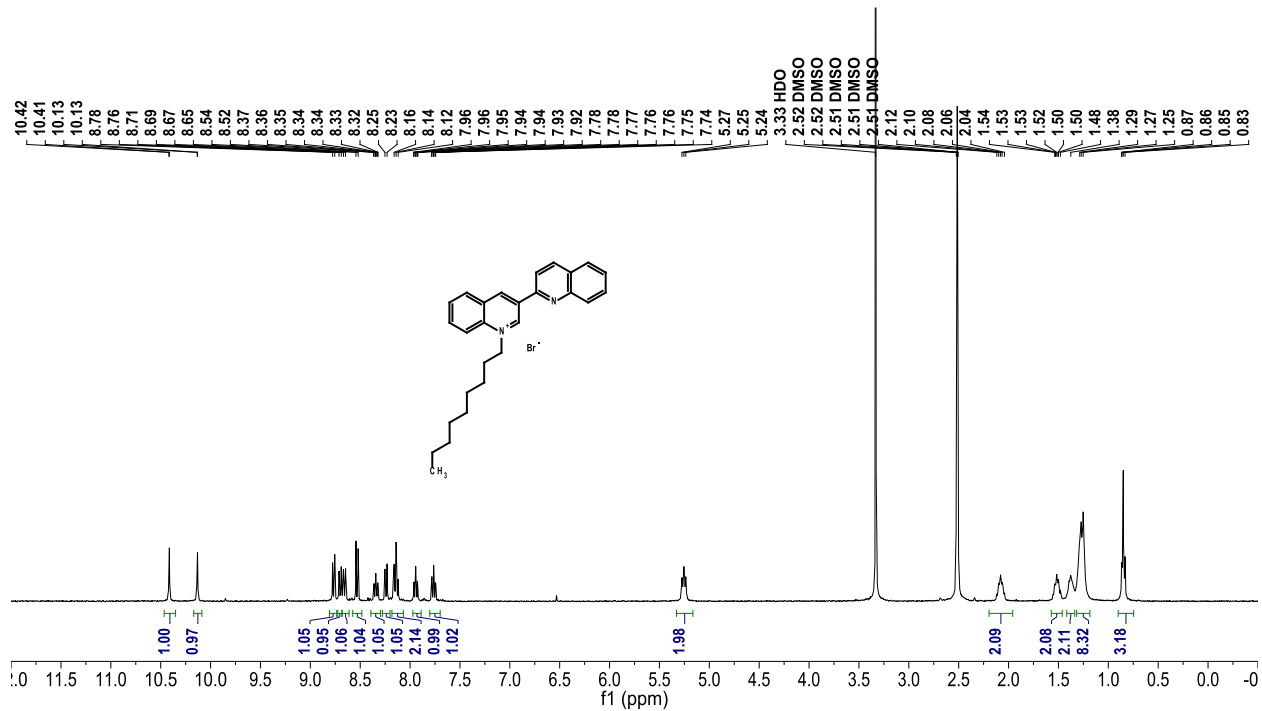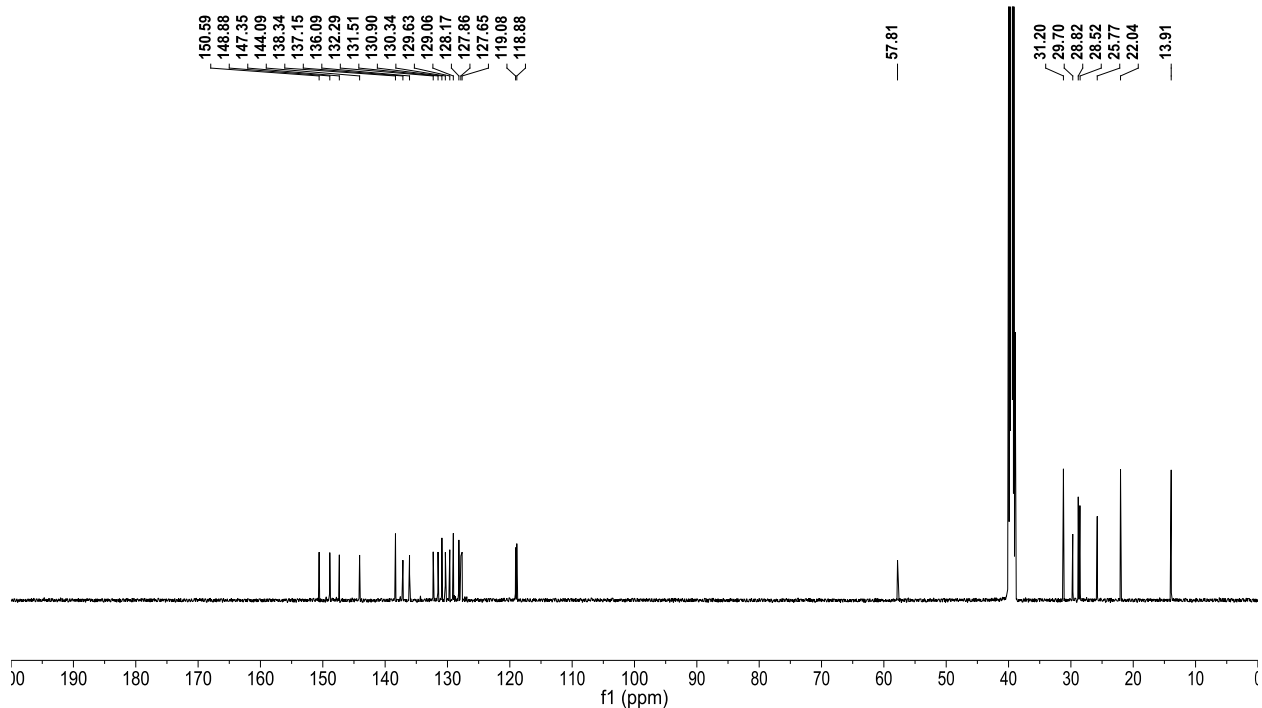

# 1-butyl-3-(naphthalen-2-yl)quinolin-1-ium bromide (23)

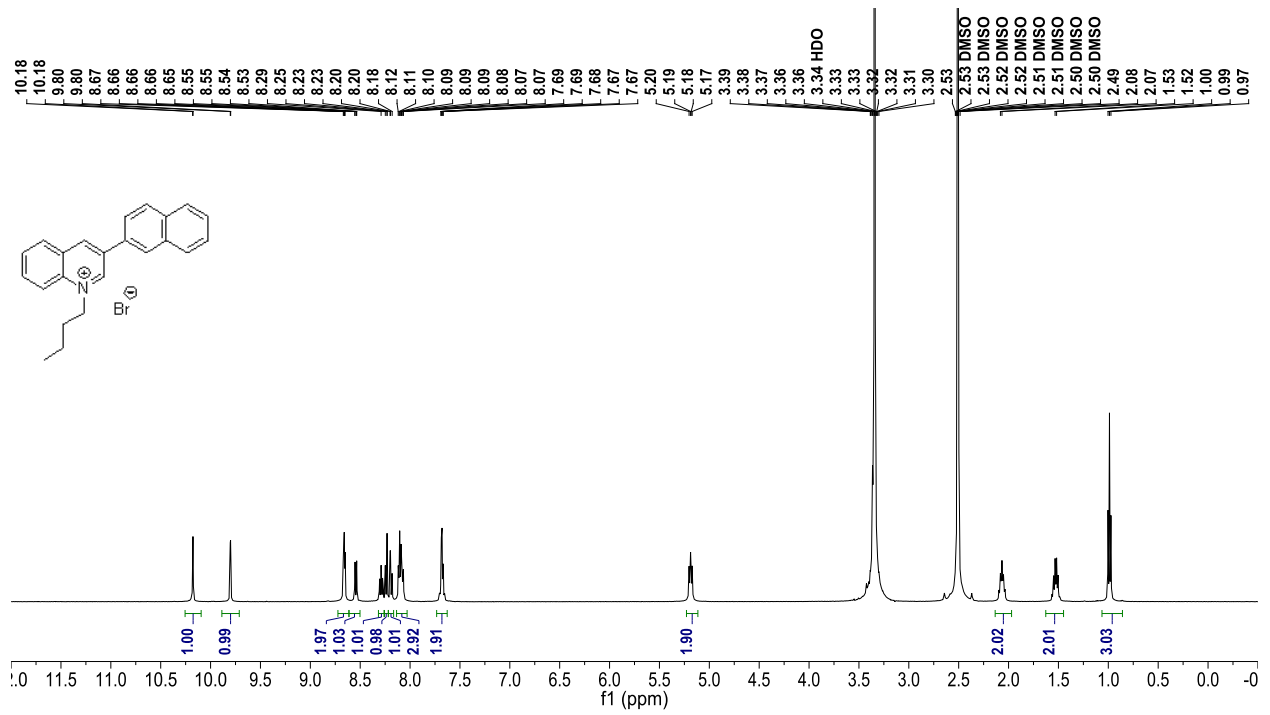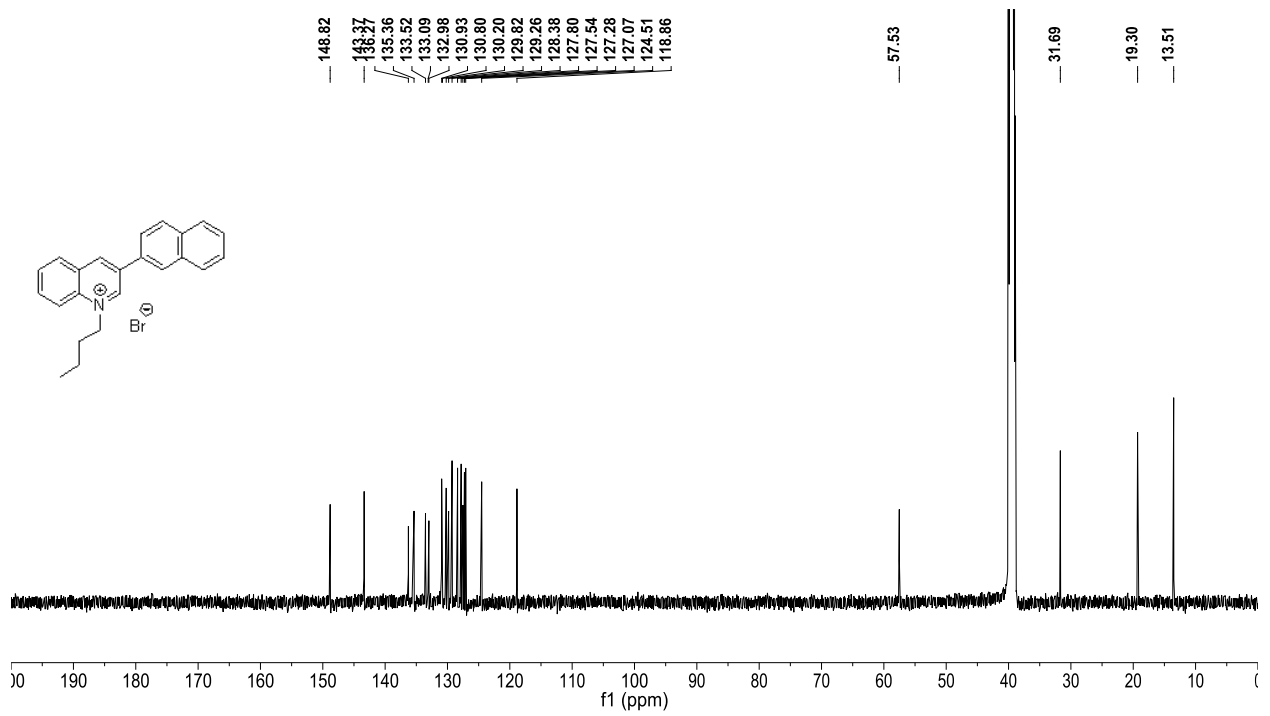

**1'-(pent-4-en-1-yl)-[2,3'-biquinolin]-1'-ium bromide (24)**

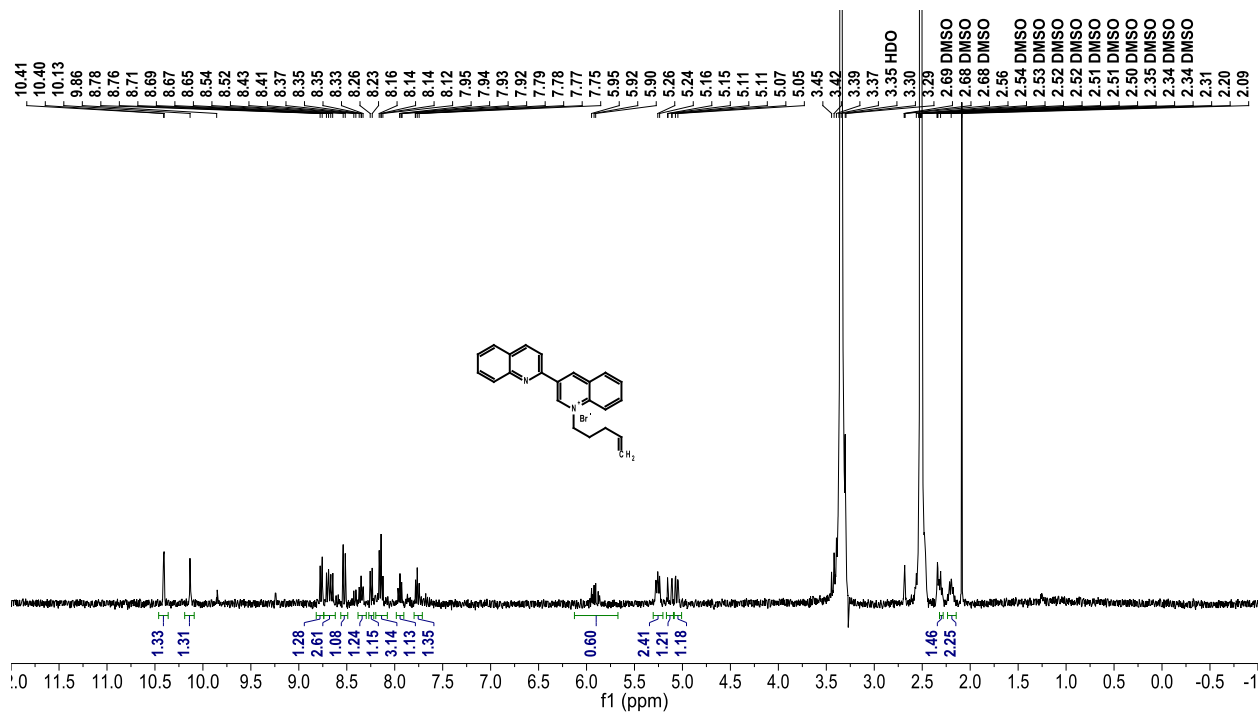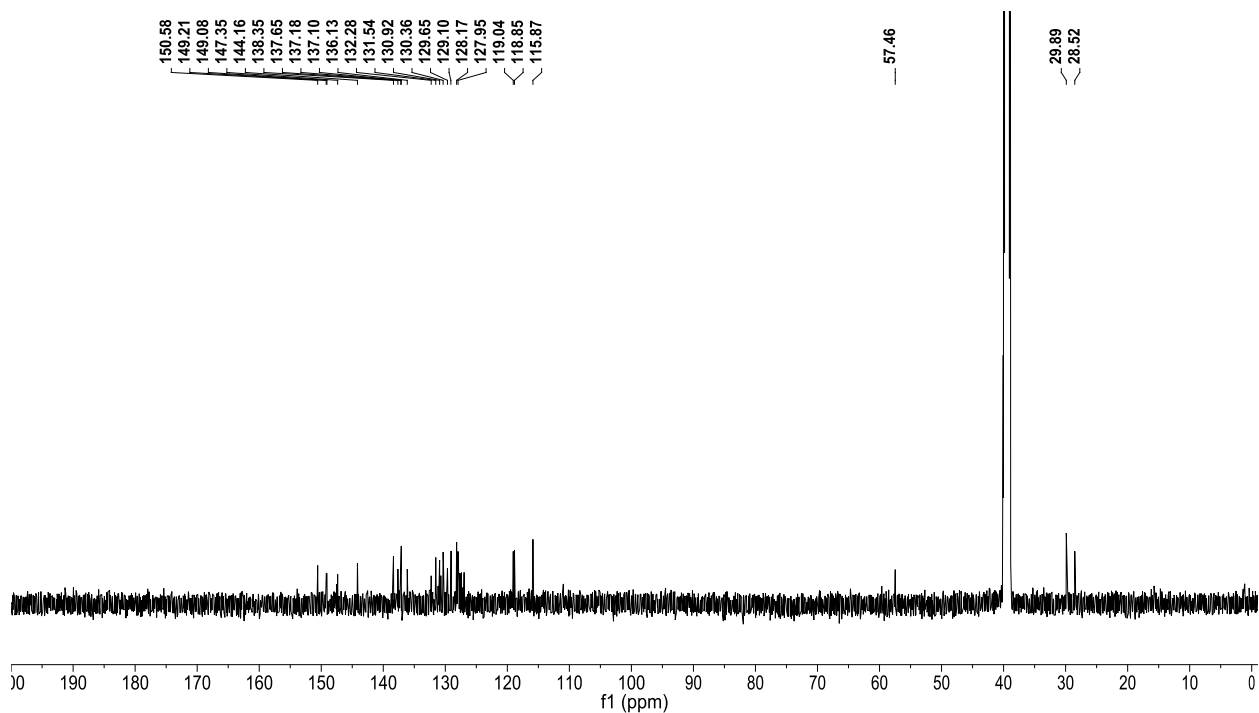

# 1-butylquinolin-1-ium bromide

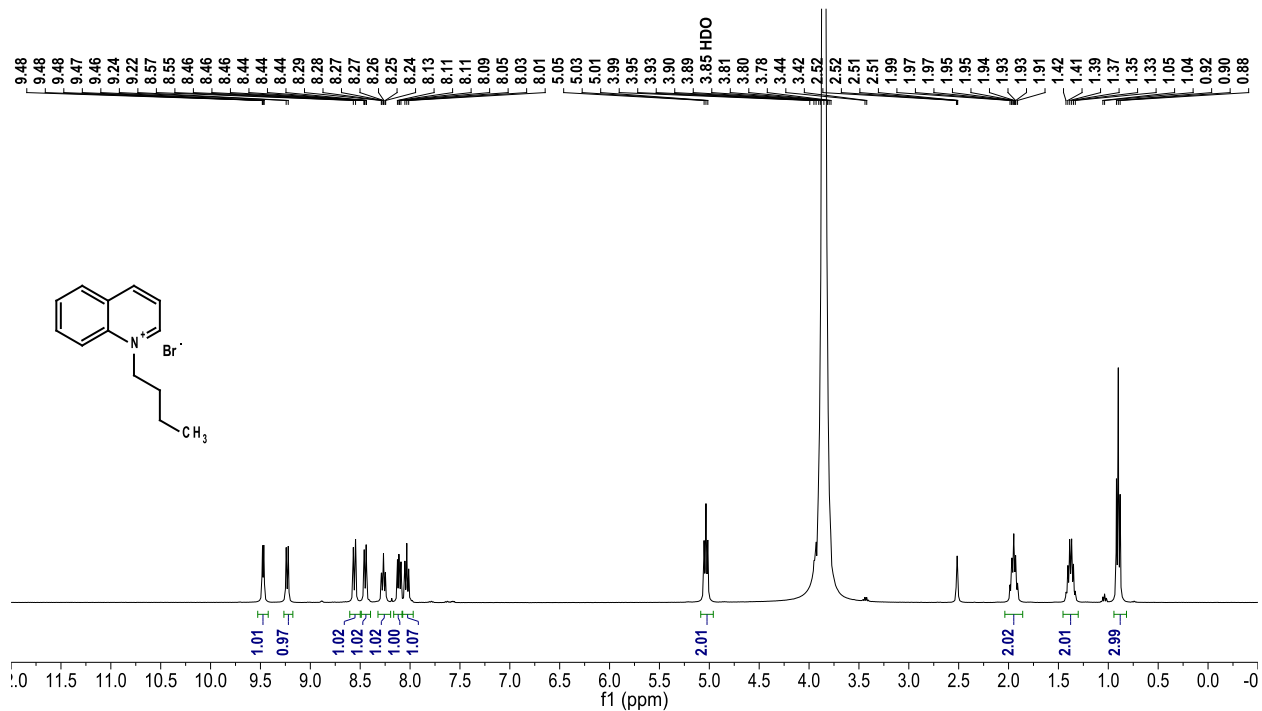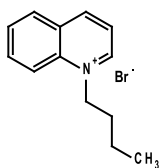

149.24  
147.37  
137.27  
135.78  
130.70  
129.92  
129.61  
121.95  
118.67

57.28

31.29

19.03

13.30

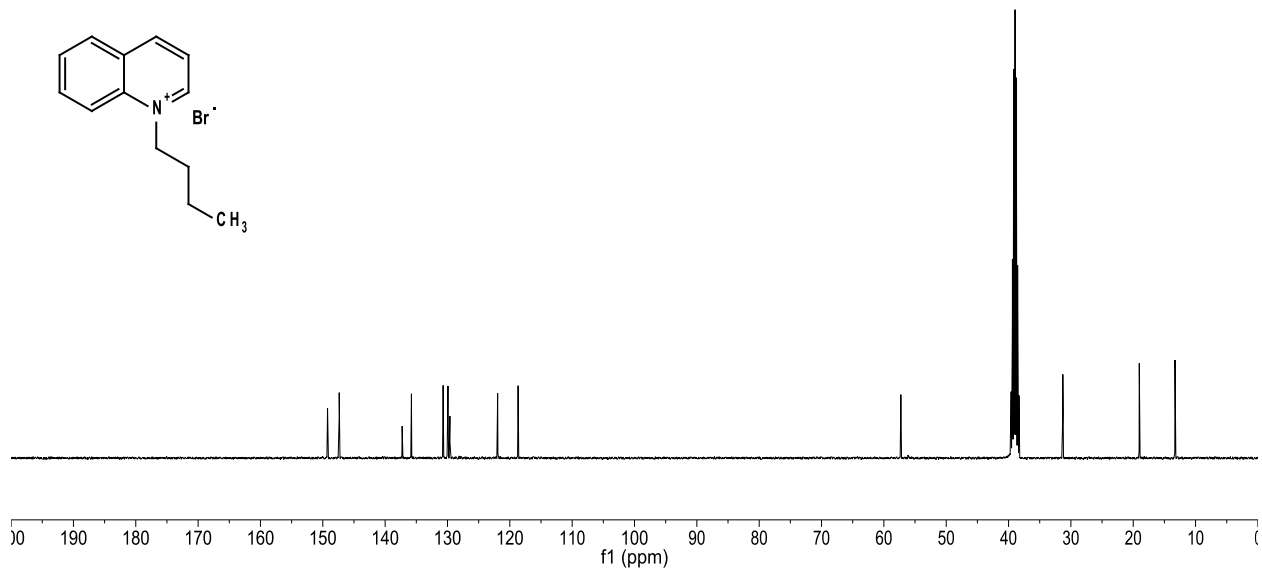

# 1-(4-chlorobenzyl)quinolin-1-ium bromide

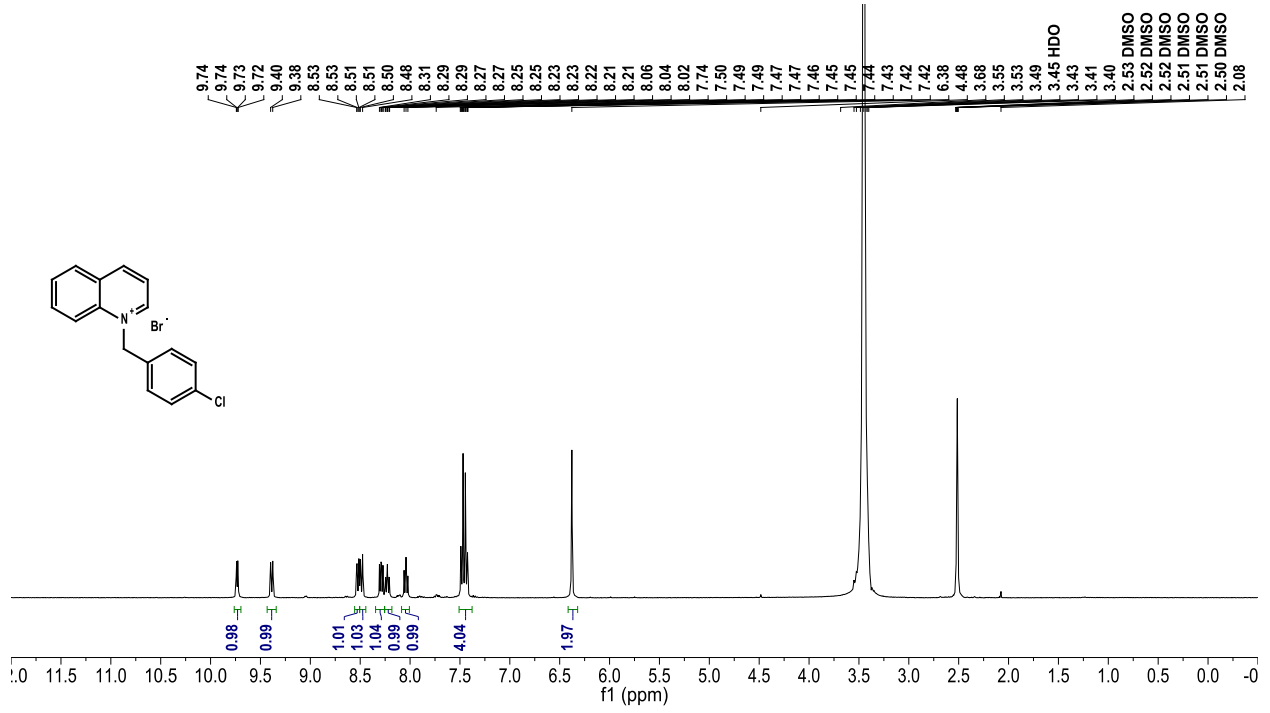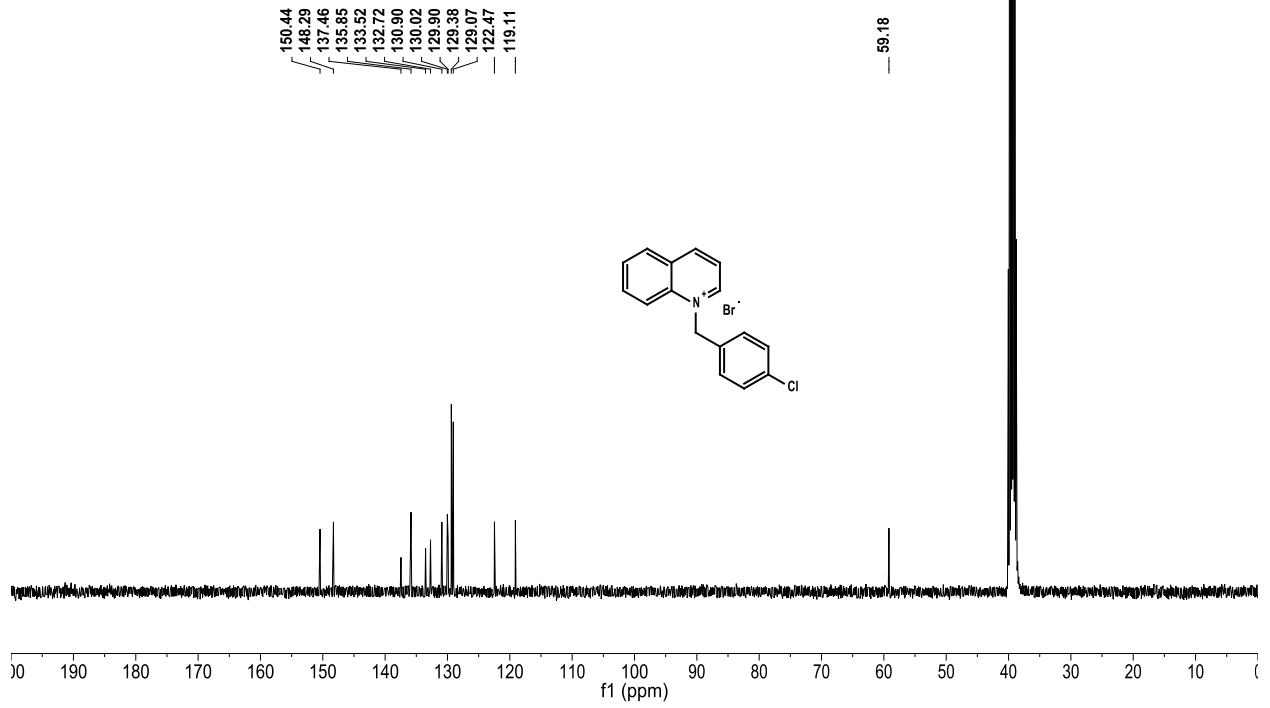



# Miscellaneous analogs

## 1'-butyl-4'-phenyl-1',4'-dihydro-2,3'-biquinoline (8)

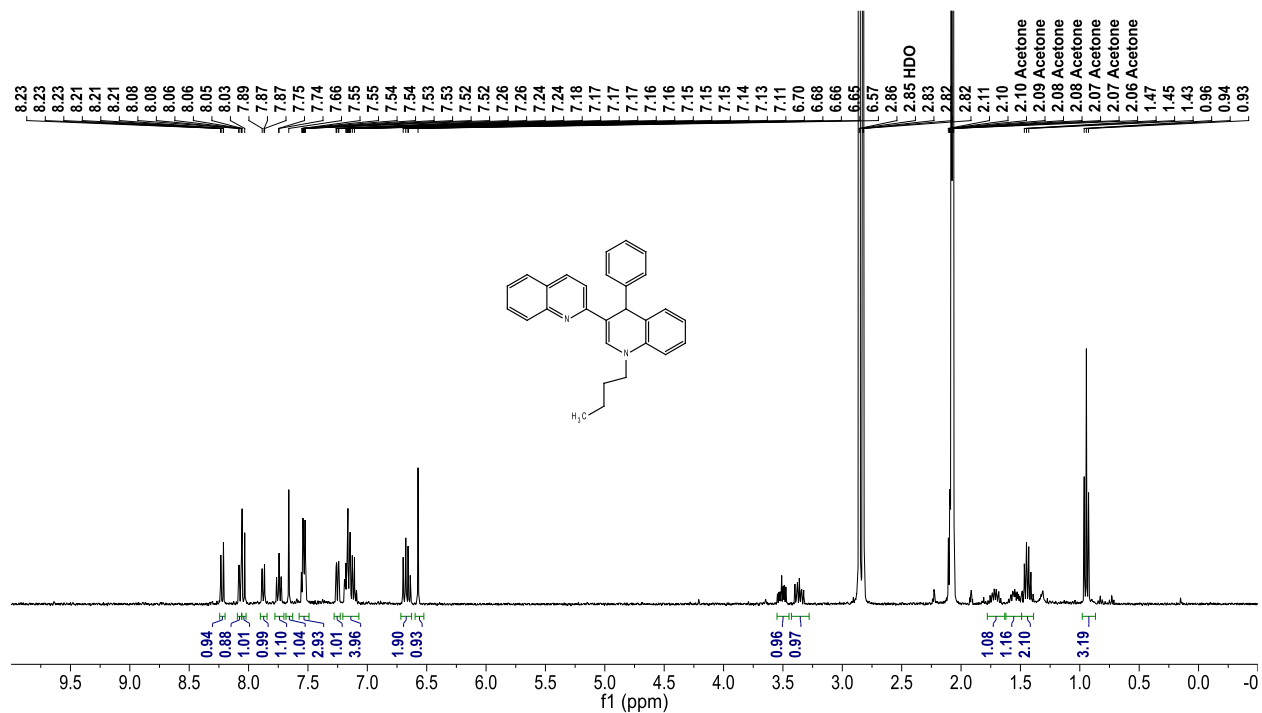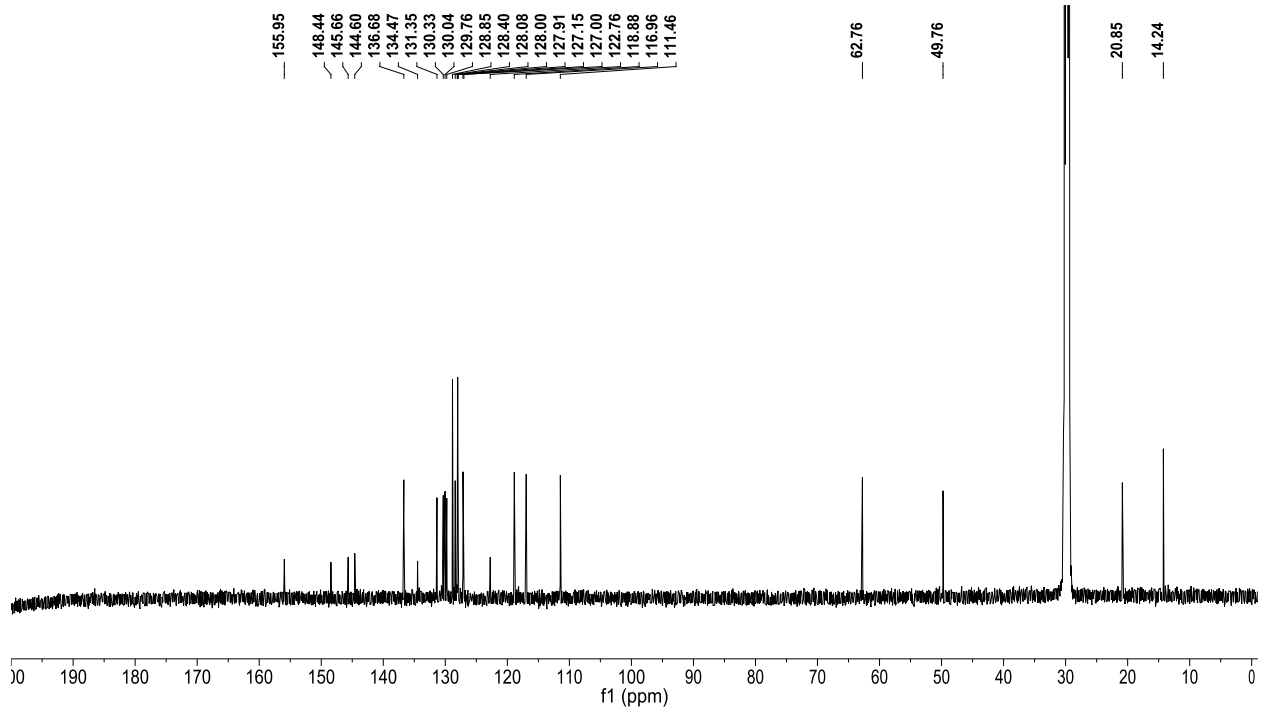

**1'-butyl-2'-phenyl-1',2'-dihydro-2,3'-biquinoline (9)**

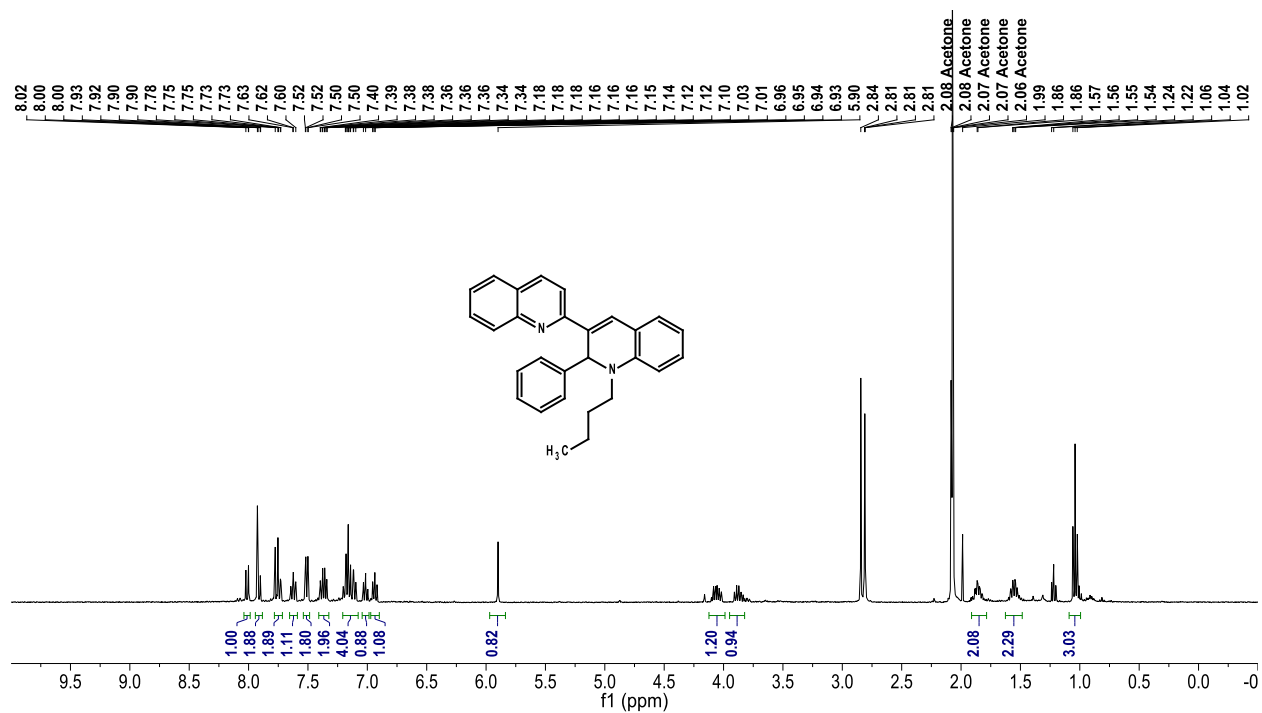

**1'-butyl-2'-methyl-1',2'-dihydro-2,3'-biquinoline (10)**

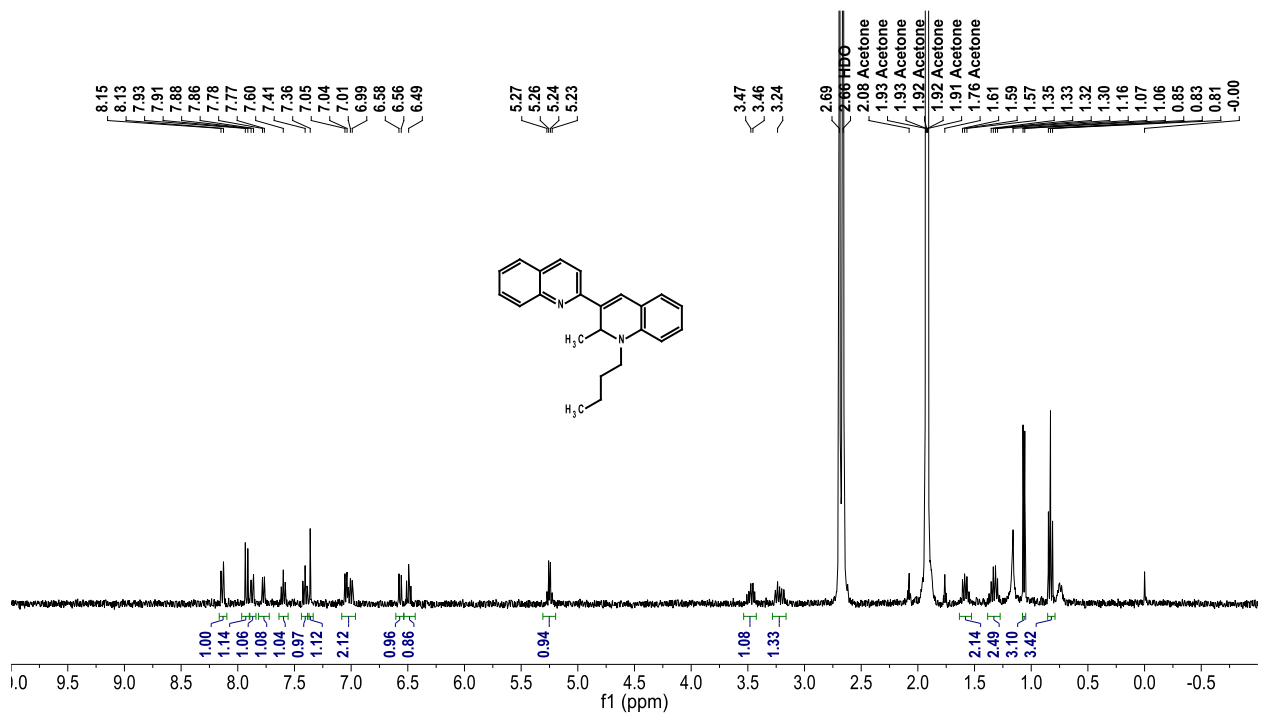

# 1'-butyl-4'-methyl-1',4'-dihydro-2,3'-biquinoline (11)

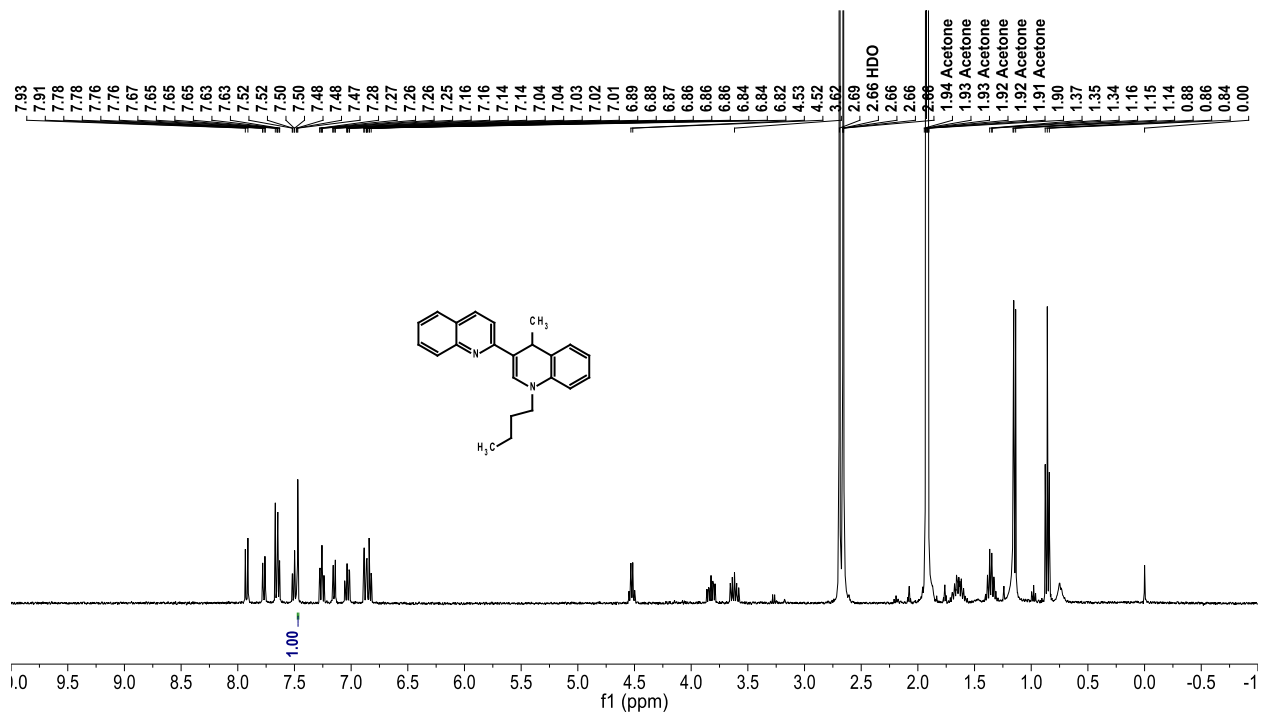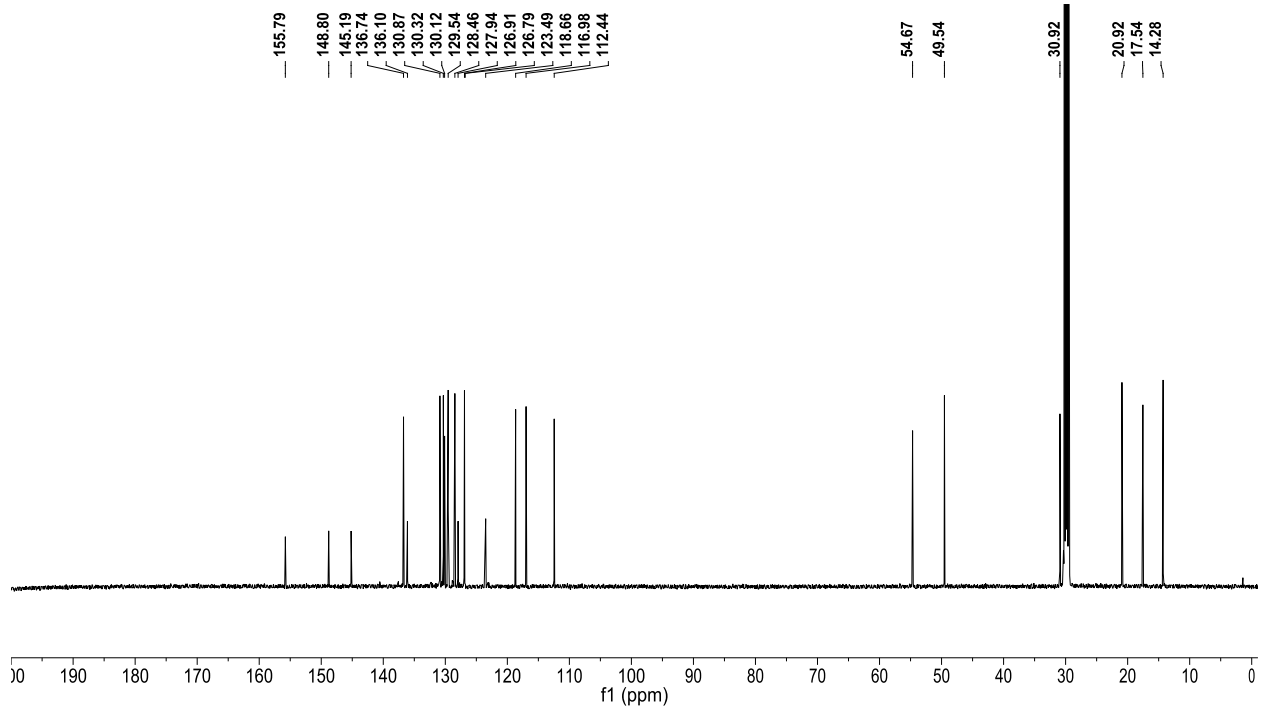

## 2-(1-butyl-1*H*-indol-3-yl)quinoline (12)

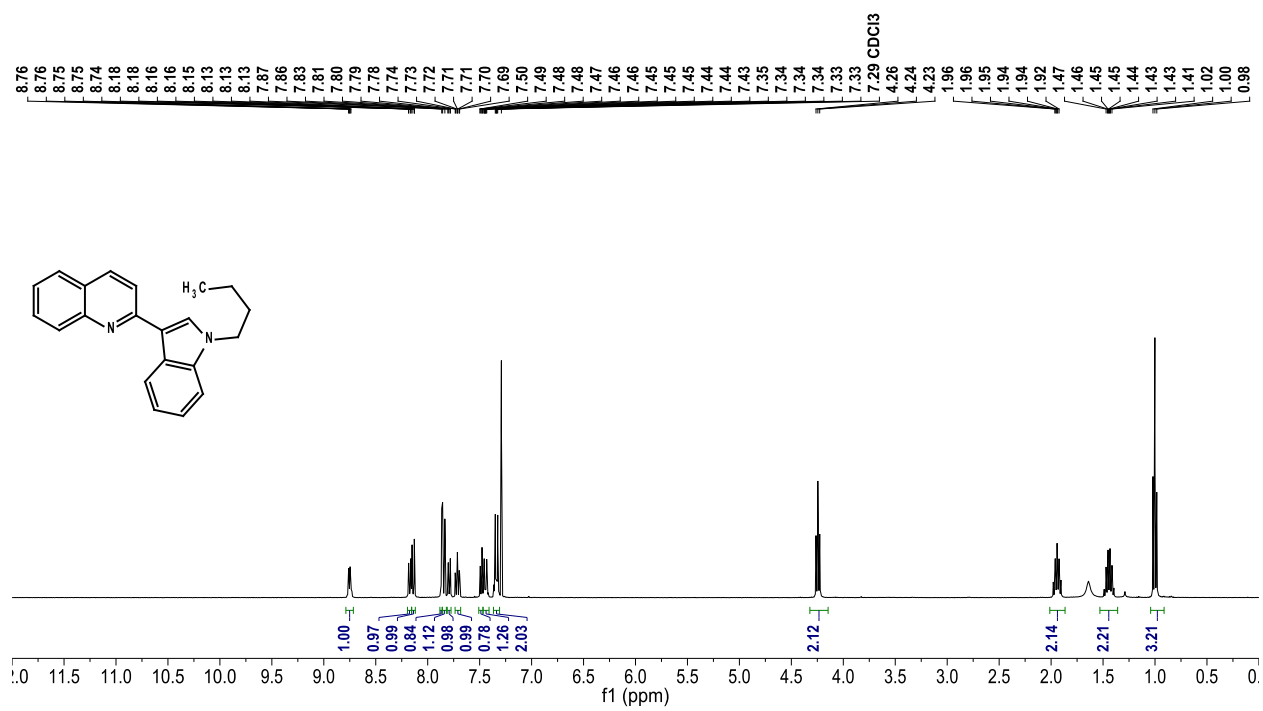

# 10-butylacridin-9(10H)-one (15)

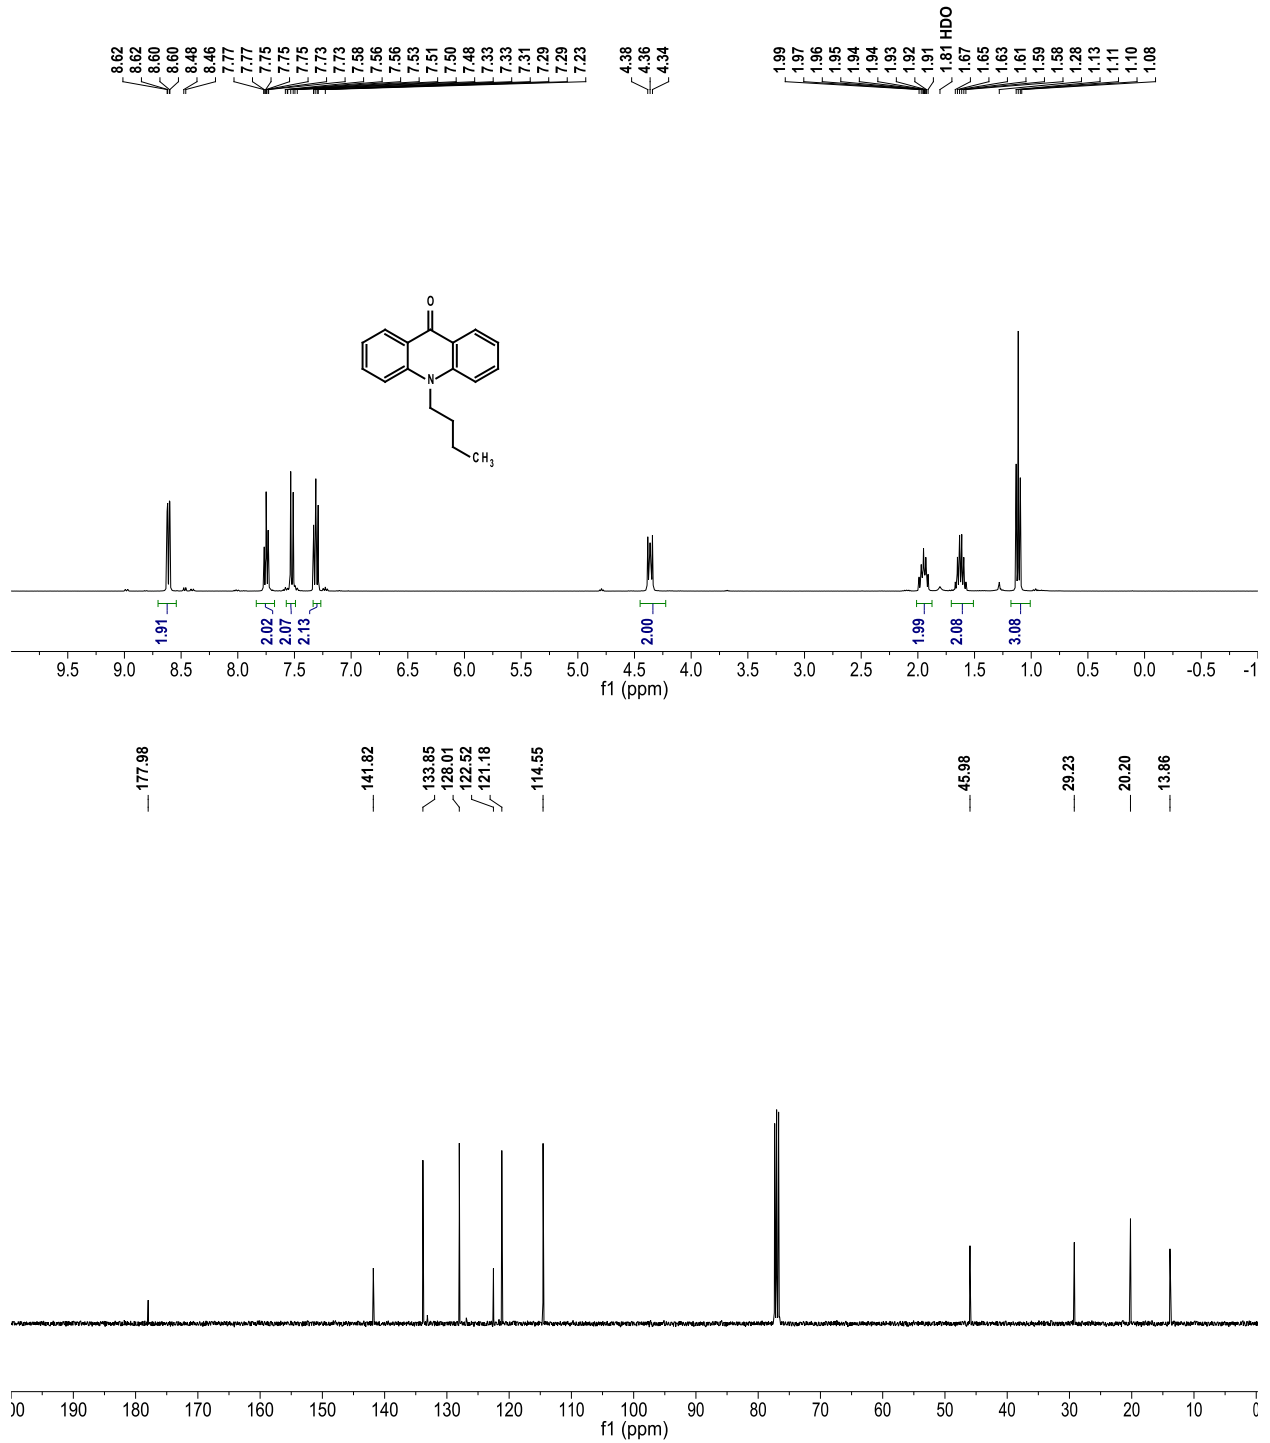

Supplement: c4ra08384a1.pdf [file c4ra08384a1.pdf]
