# Supplementary material for: 3-Substituted biquinolinium inhibitors of AraC family transcriptional activator VirF from S. flexneri obtained through in situ chemical ionization of 3,4-disubstituted dihydroquinolines
Source: Royal Society of Chemistry journal article supplement (doi:10.1039/c4ra08384a), 2014-08-18

**1'-Butyl-4'-(nitromethyl)-1',4'-dihydro-2,3'-biquinoline (SE-1):**

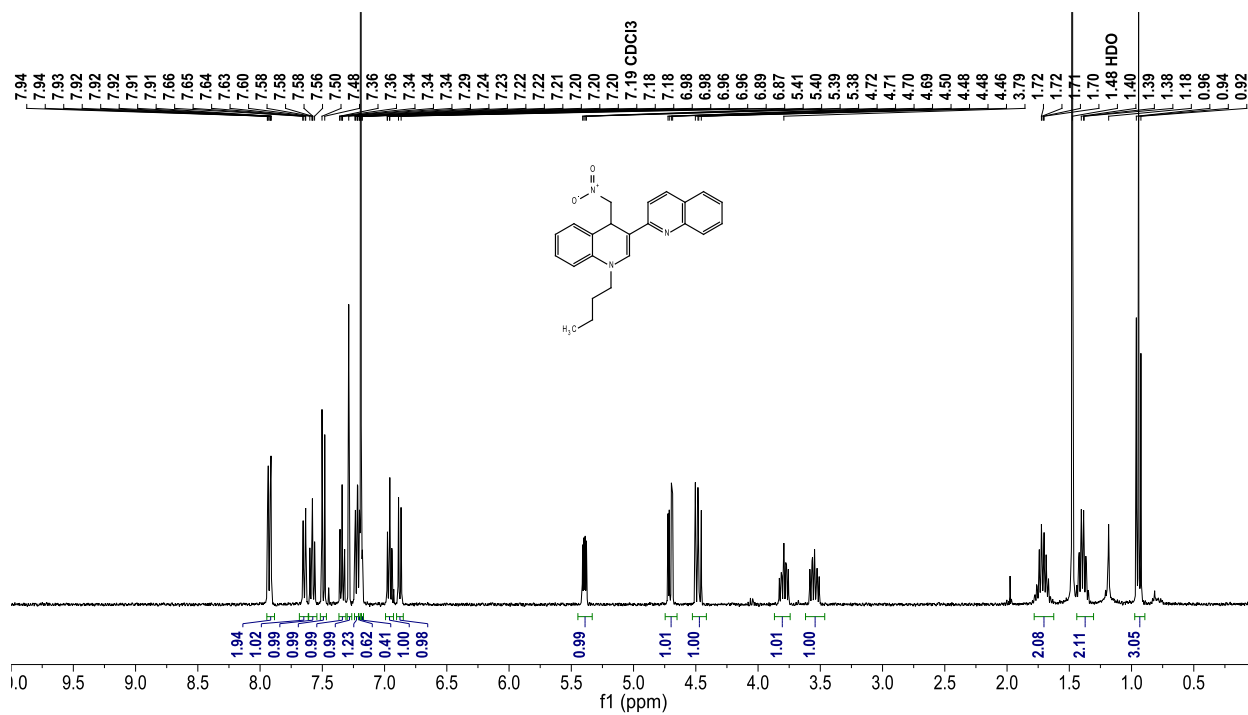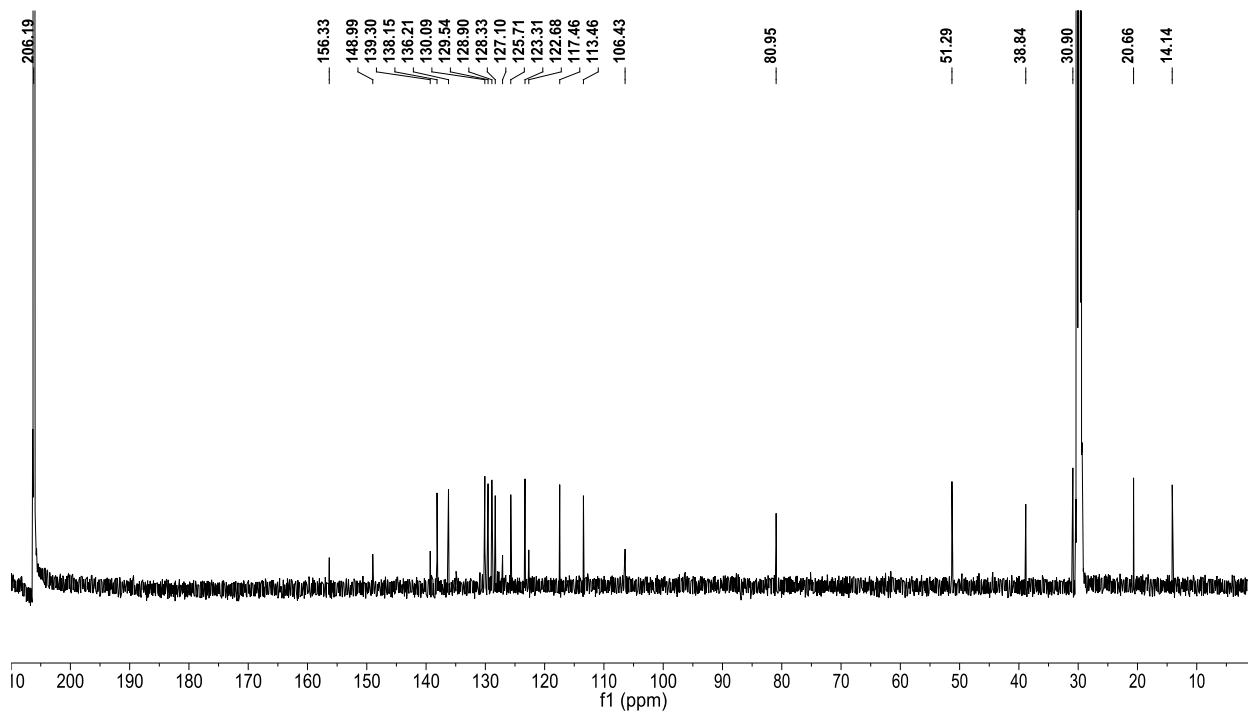

# 1'-(4-chlorobenzyl)-4'-(nitromethyl)-1',4'-dihydro-2,3'-biquinoline(5):

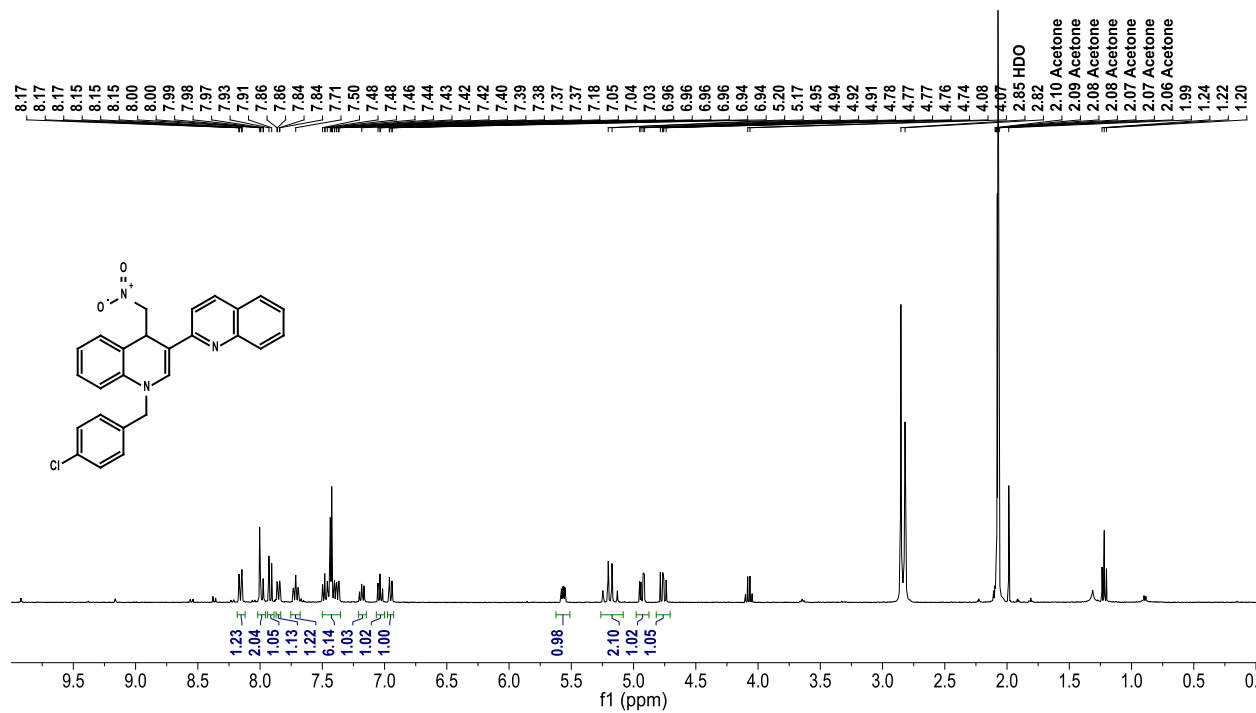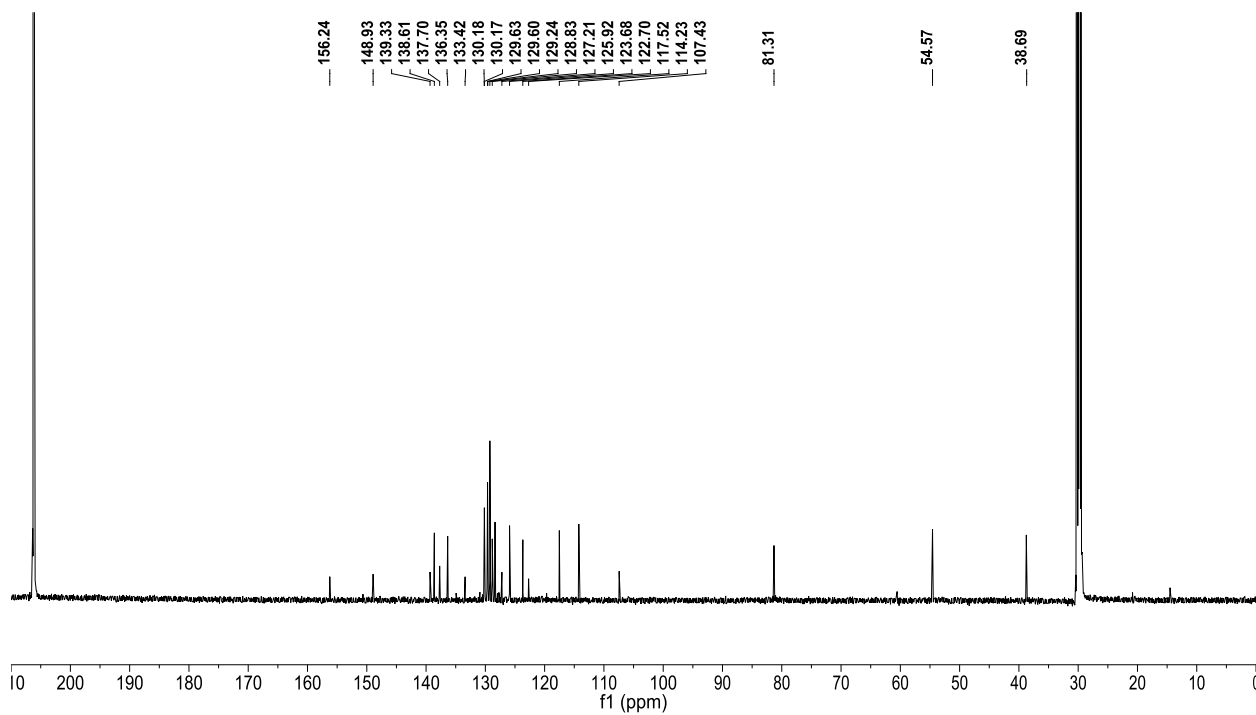

# 1-butyl-3-(6-methylpyridin-2-yl)-4-(nitromethyl)-1,4-dihydroquinoline (6)

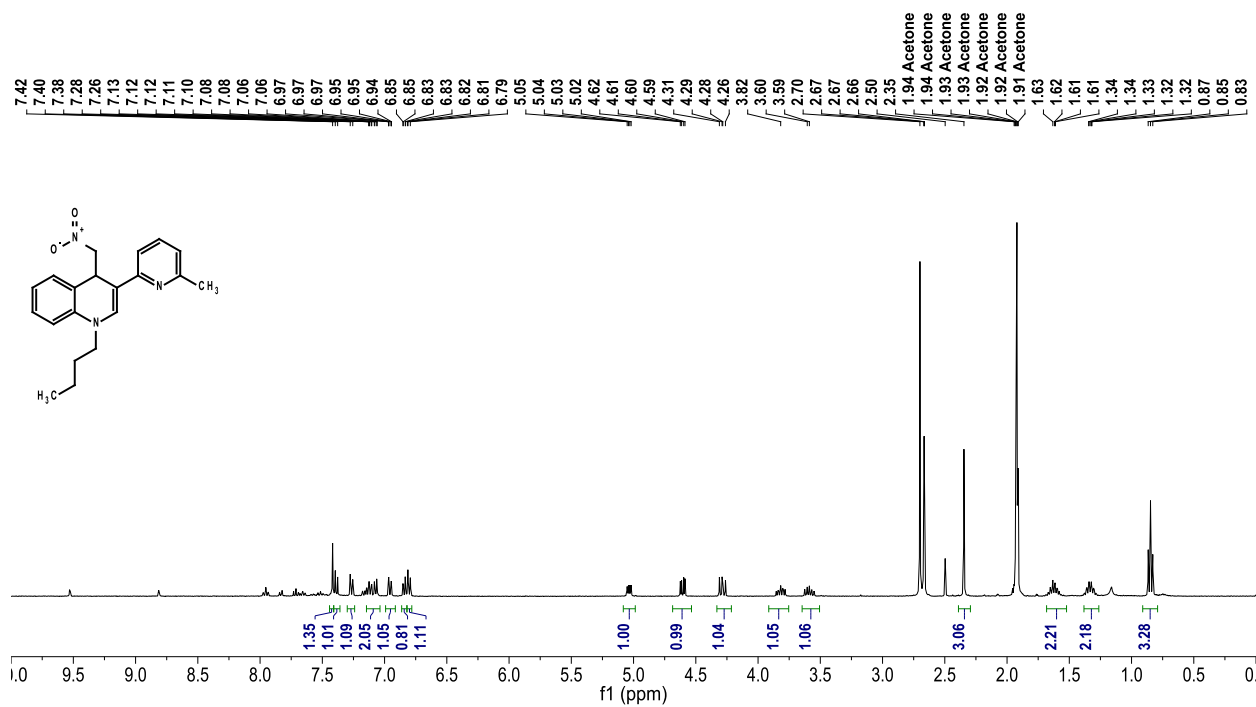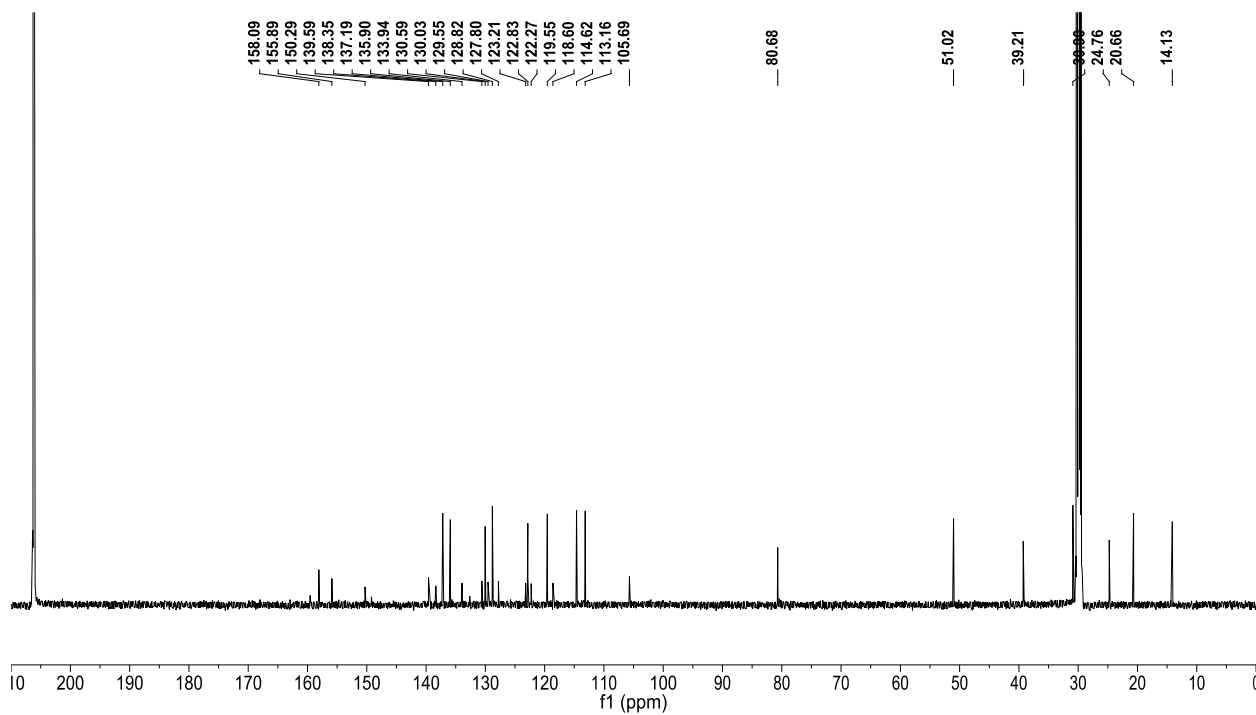

# 1-(4-chlorobenzyl)-3-(6-methylpyridin-2-yl)-4-(nitromethyl)-1,4-dihydroquinoline

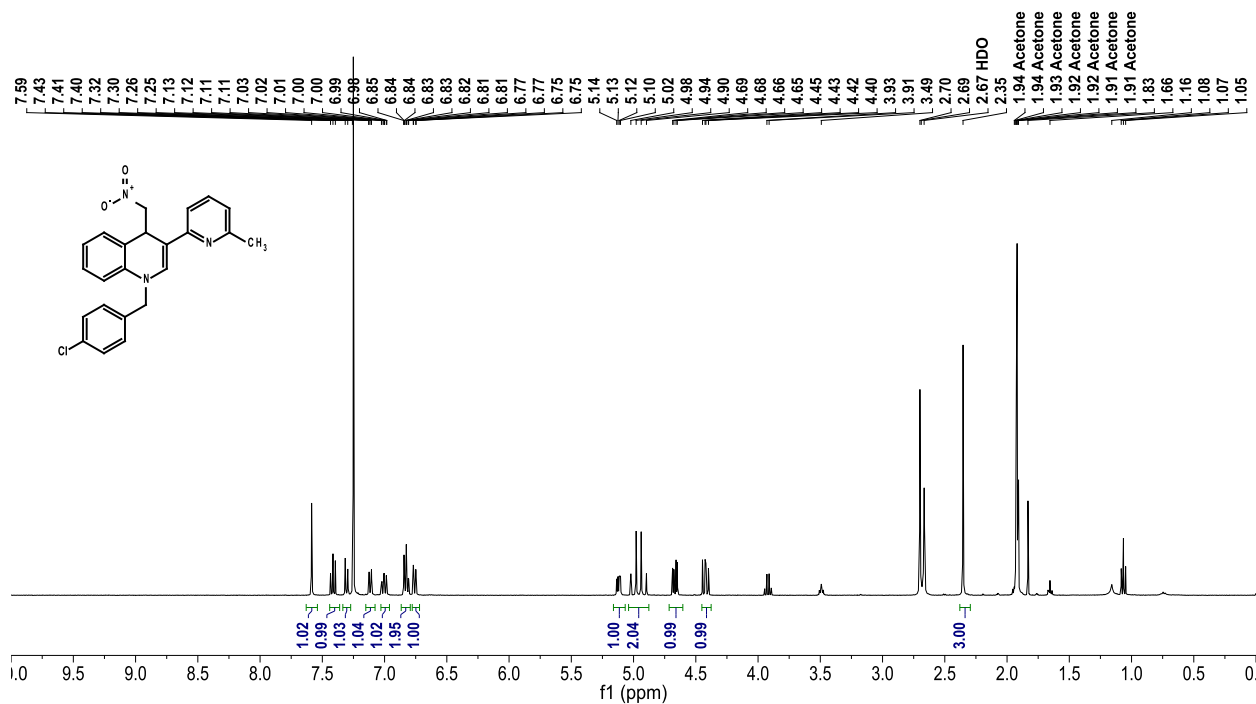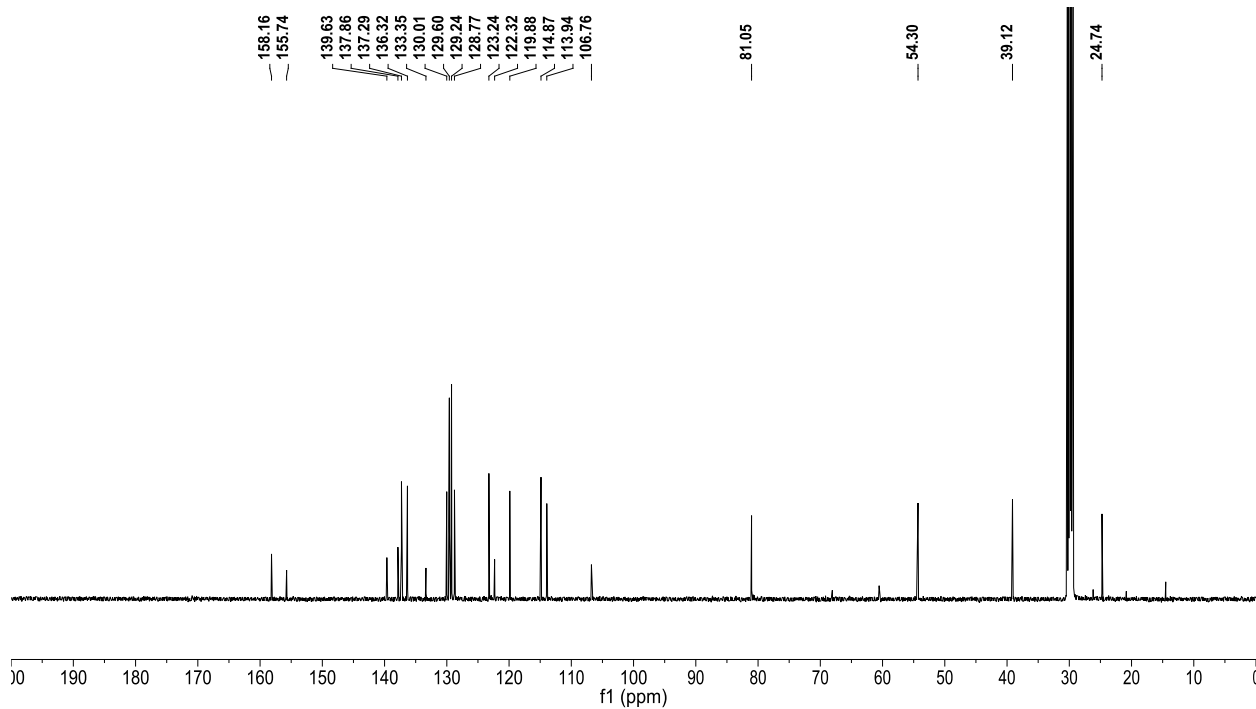

**1-butyl-3-(3-chlorophenyl)-4-(nitromethyl)-1,4-dihydroquinoline (7)**

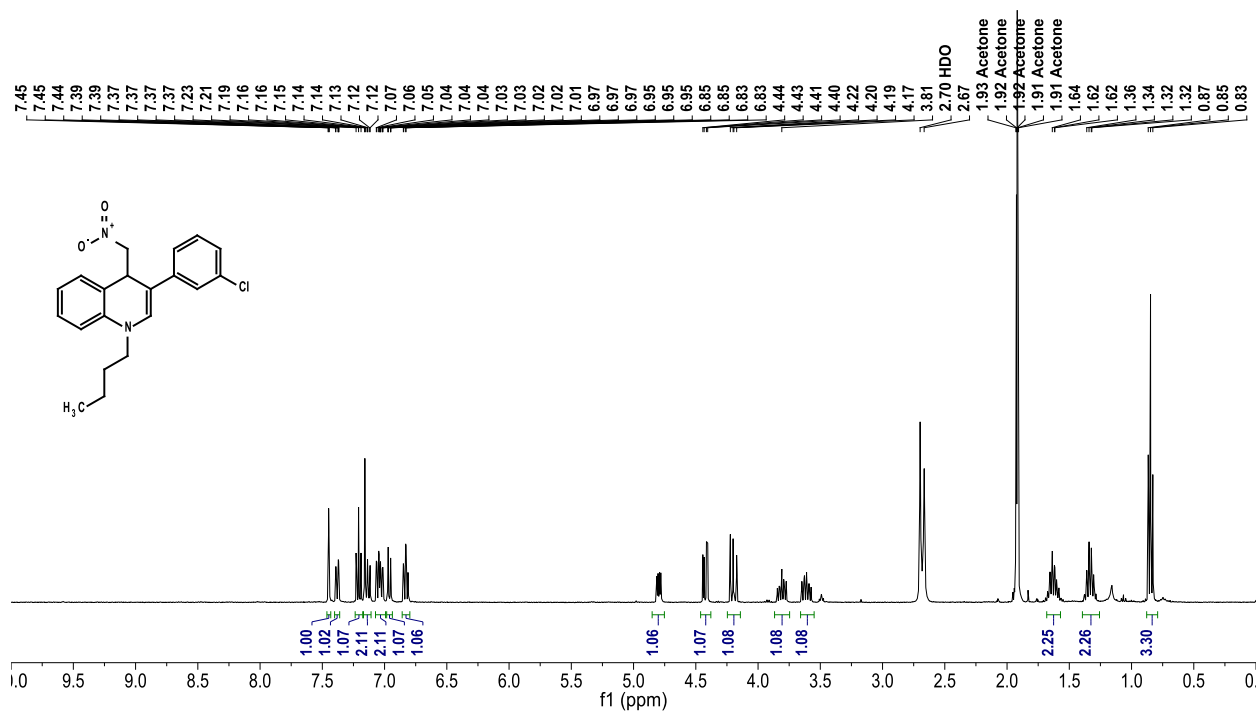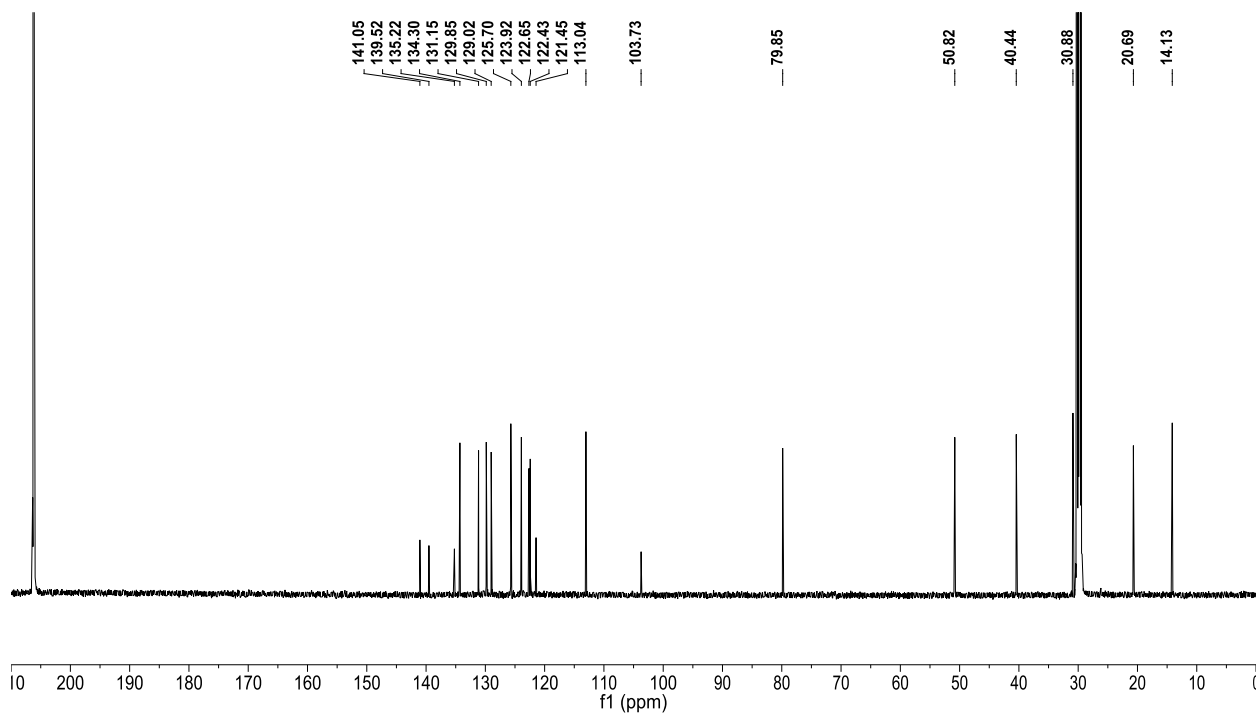

# 1-(4-chlorobenzyl)-3-(3-chlorophenyl)-4-(nitromethyl)-1,4-dihydroquinoline

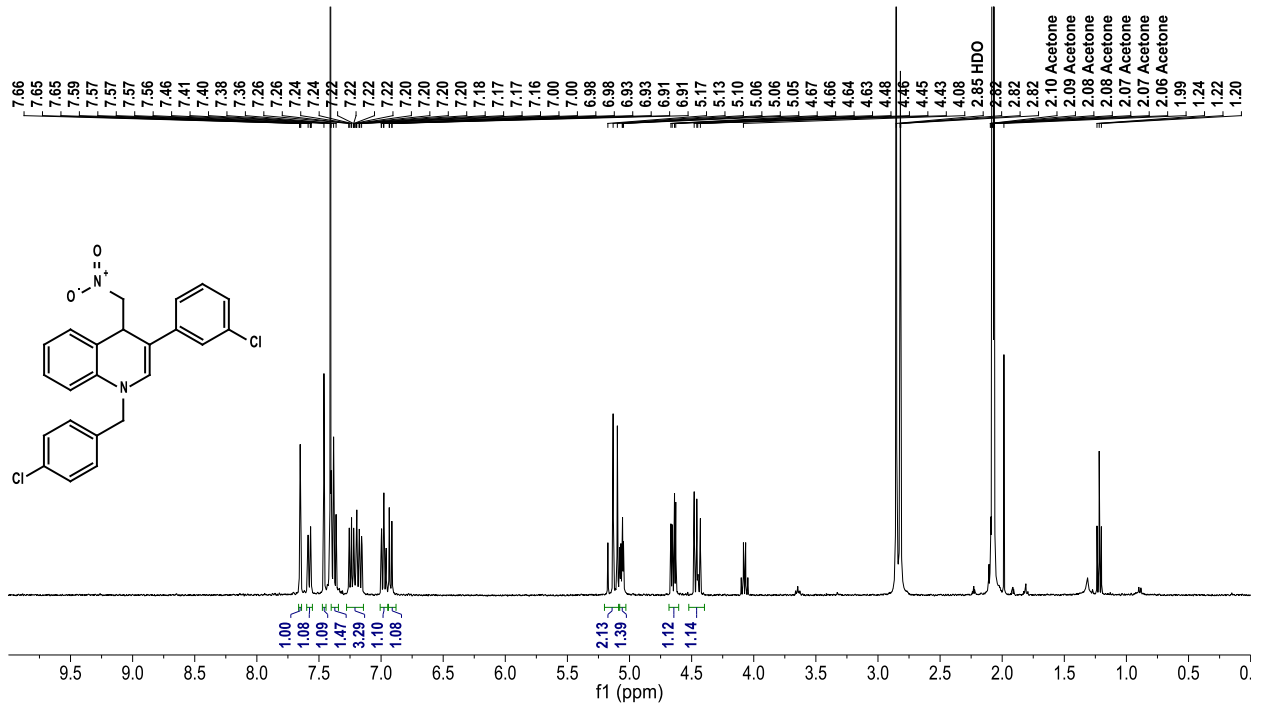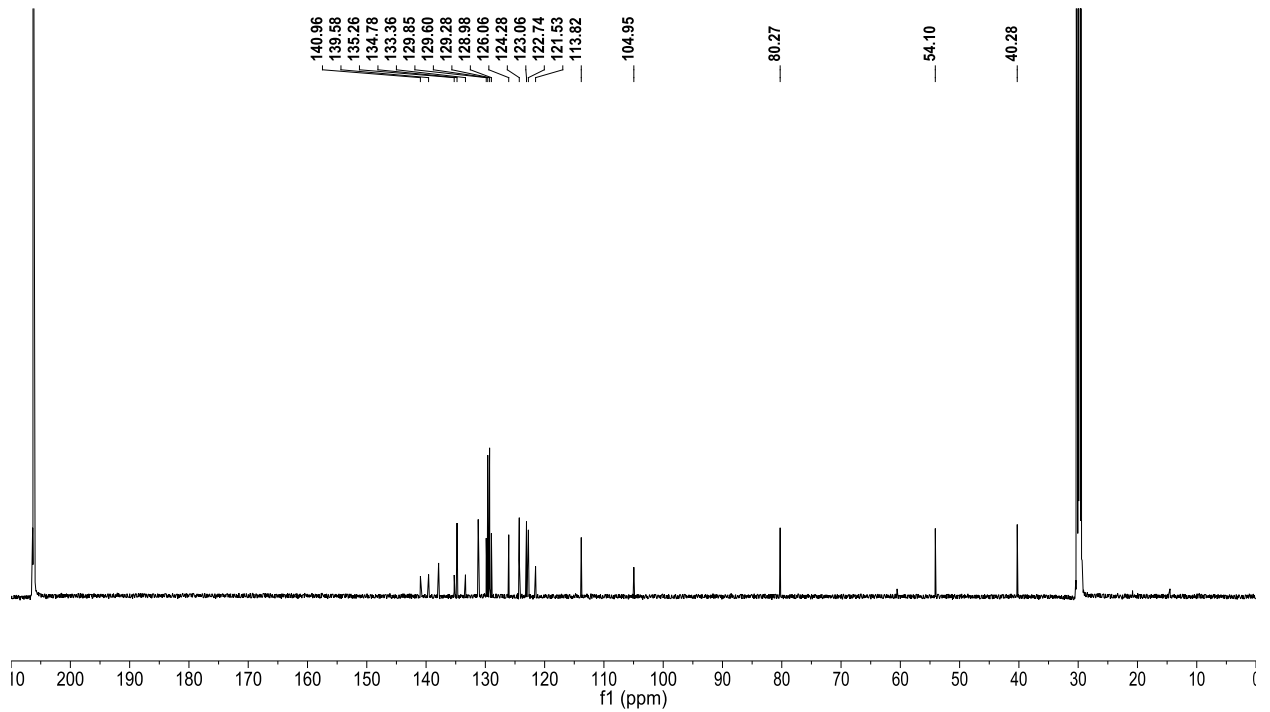

# 1'-butyl-1',4'-dihydro-[2,3'-biquinoline]-4'-carbonitrile (C1)

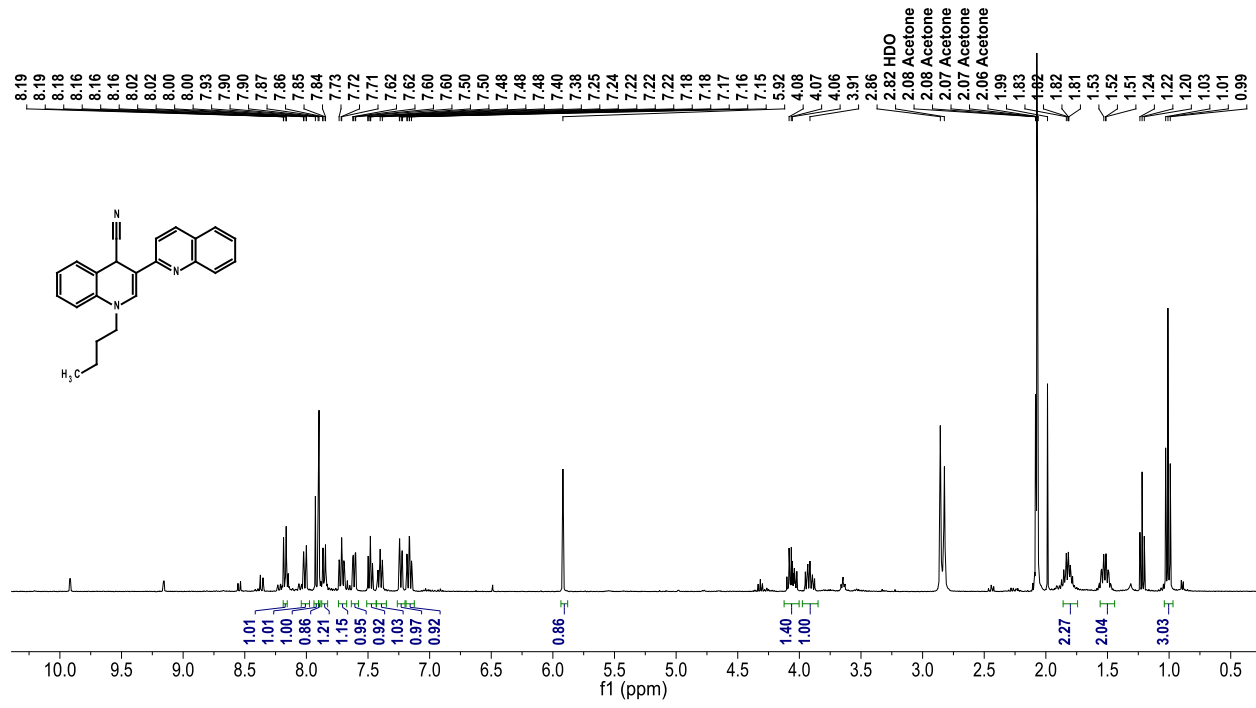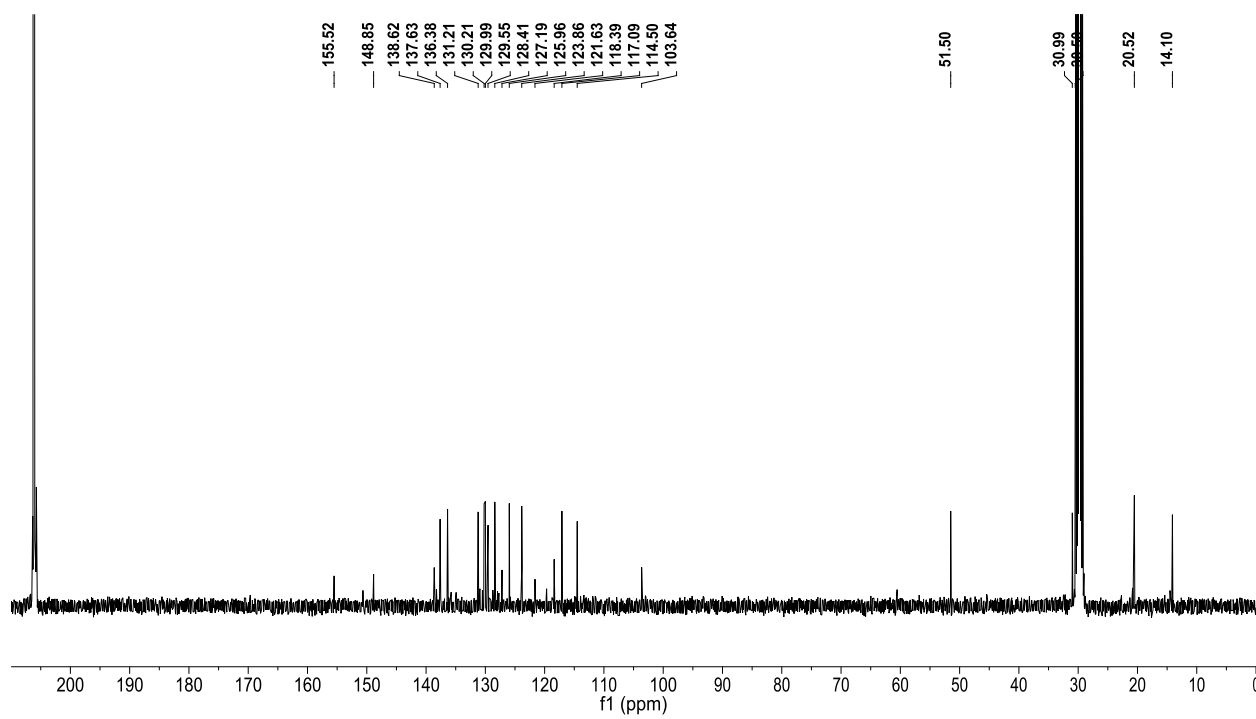

Supplement: c4ra08384a2.pdf [file c4ra08384a2.pdf]
