# Supplementary material for: 3-Substituted biquinolinium inhibitors of AraC family transcriptional activator VirF from S. flexneri obtained through in situ chemical ionization of 3,4-disubstituted dihydroquinolines
Source: Royal Society of Chemistry journal article supplement (doi:10.1039/c4ra08384a), 2014-08-18

Commercial analogue analysis:

A1

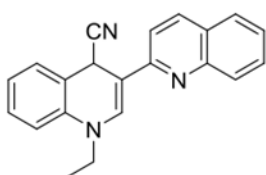

A2

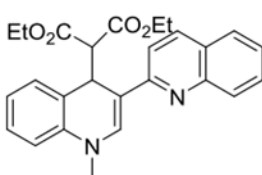

A3

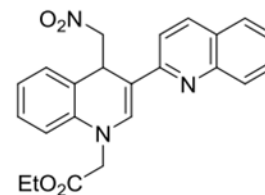

C4

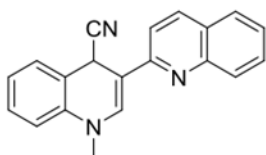

D3

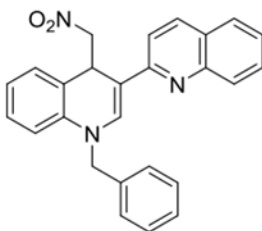

E1

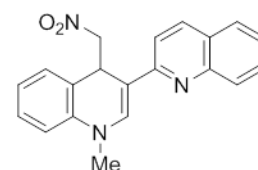

VirF

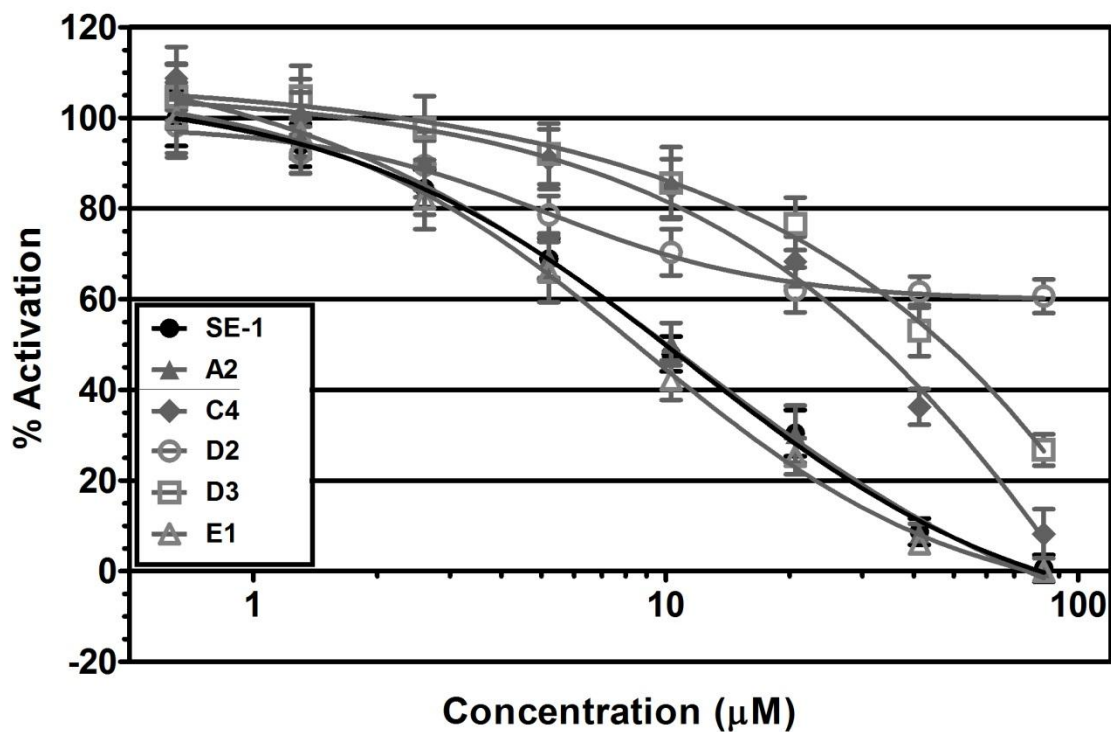

# VirF

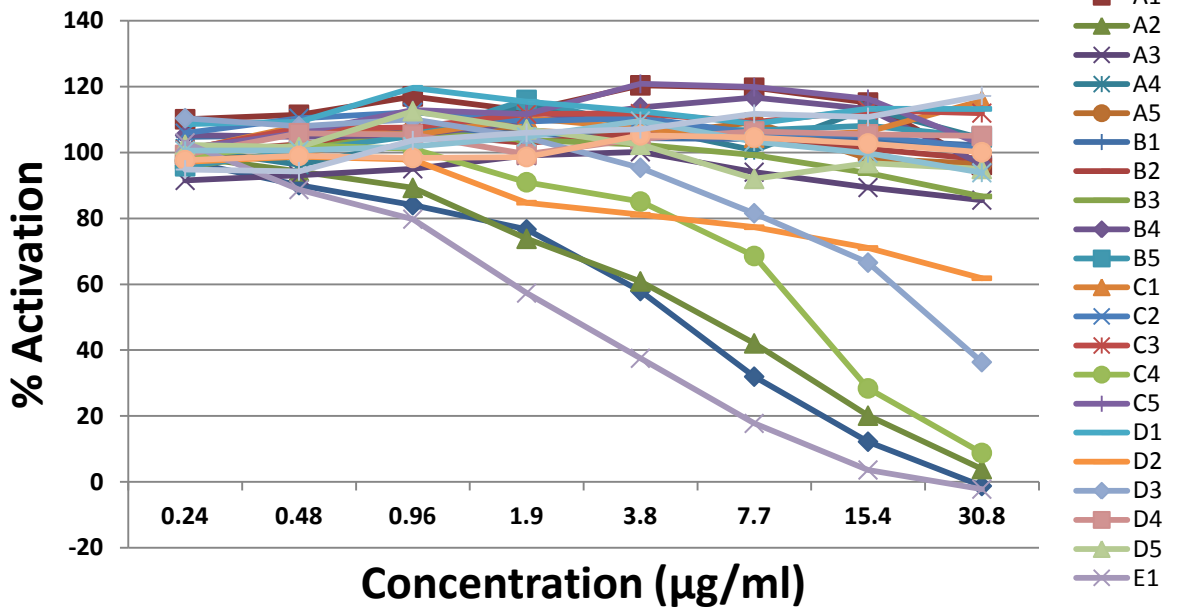

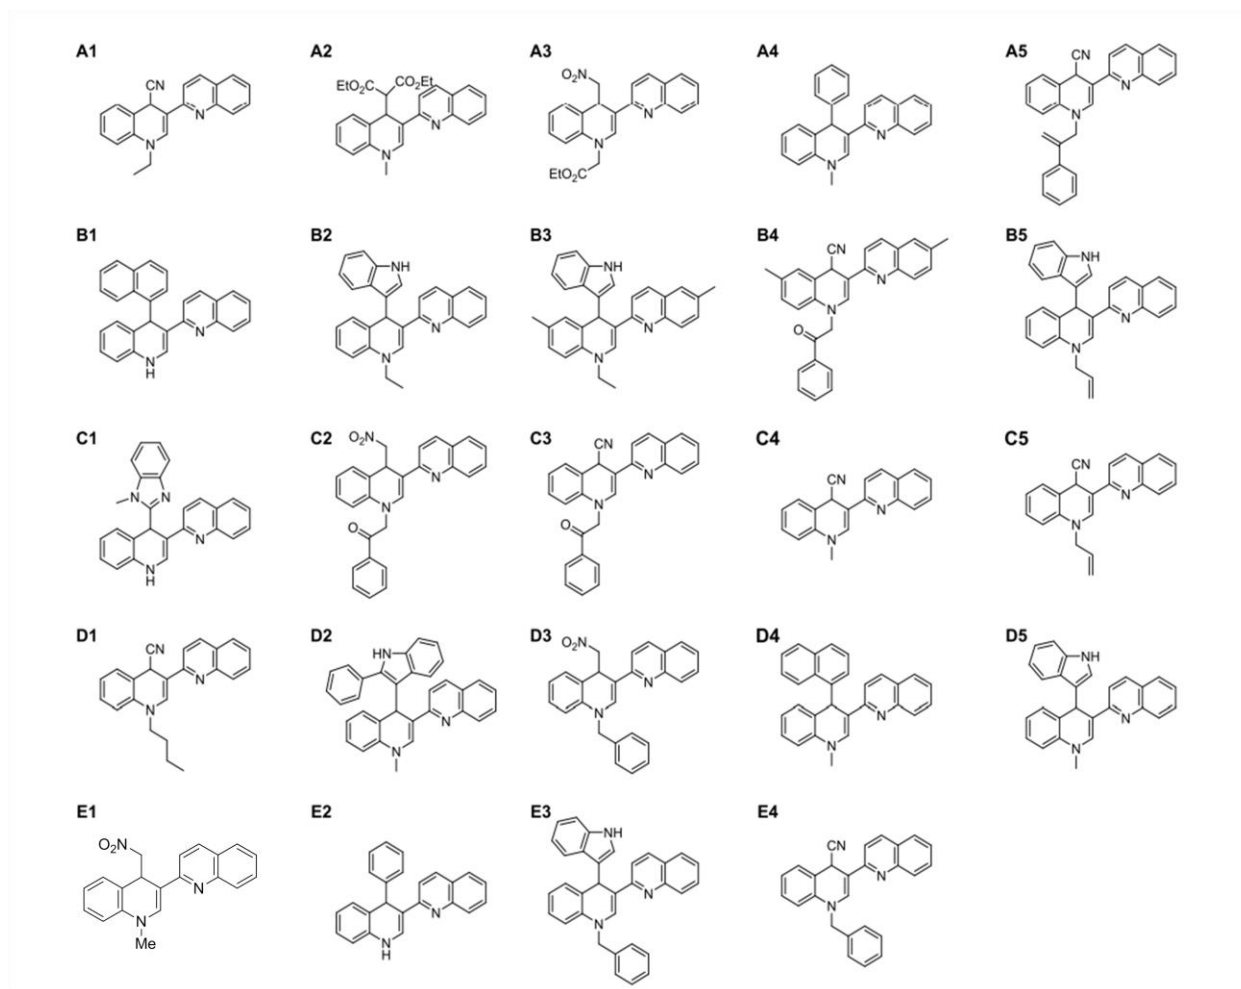

**Stability analysis:**

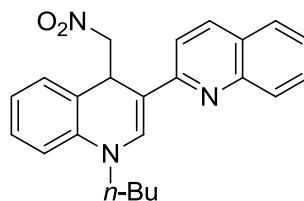

All of this material was degraded before the first injection of the stability assay in both the PBS (No nucleophile) control and the samples containing 5 X GSH.

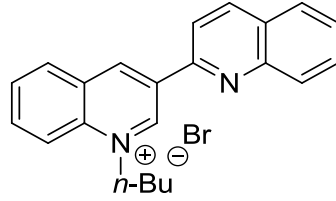

1. CMC-311-49w/ 5X GSH

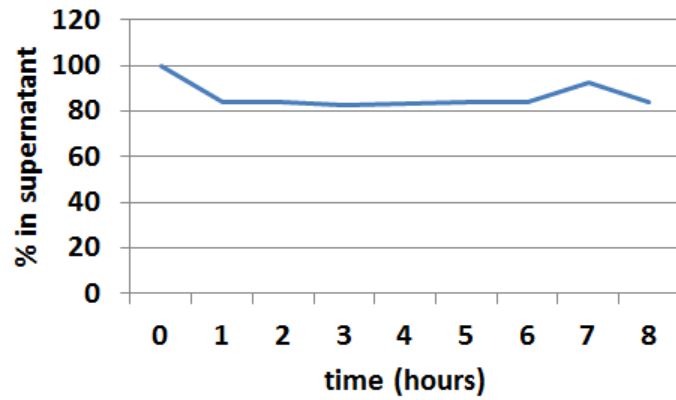

2. CMC-311-49w/o NU:8 hours

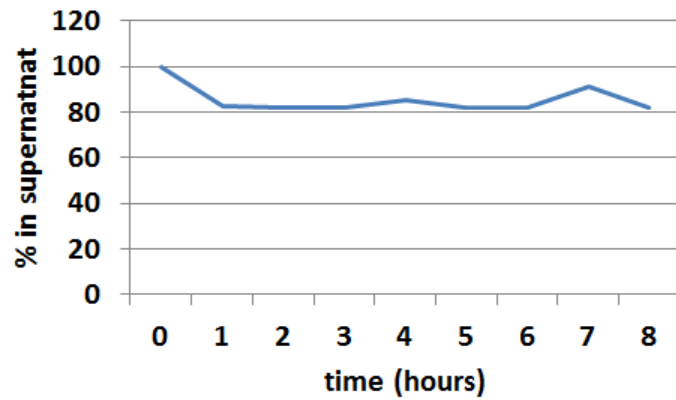

3. CMC-311-49w/o NU:48 hours

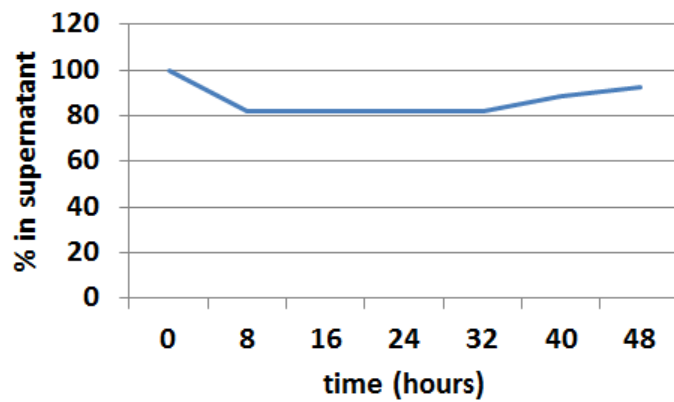

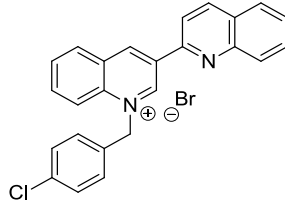

4. CMC-311-70w/ 5X GSH

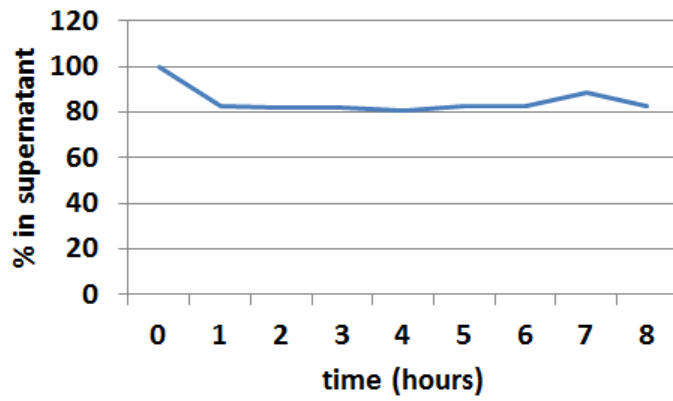

5. CMC-311-70w/o NU: 8 hours

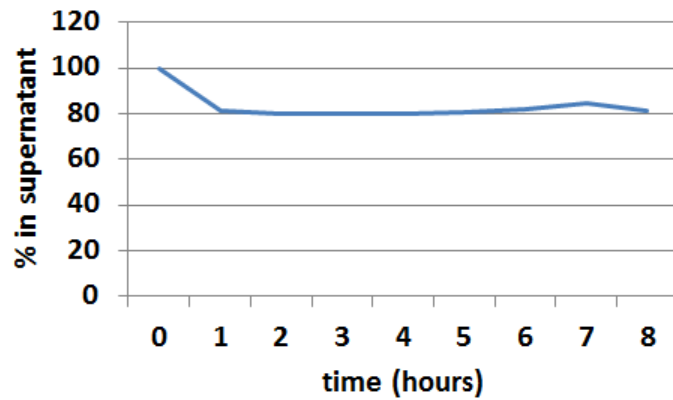

6. CMC-311-70w/o NU: 48 hours

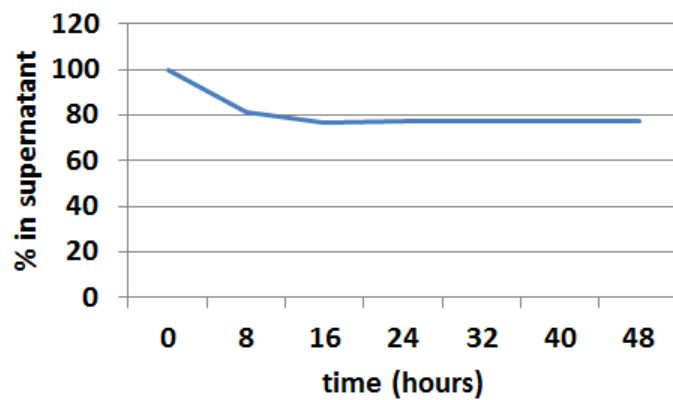

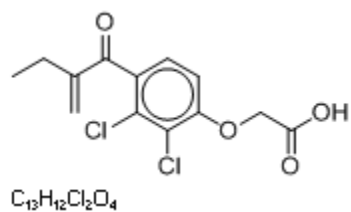

7. Control reactions showing the addition of GSH to Ethacrynic Acid in PBS (1/1) over 8 hours (PBS control in blue and 5 X GSH in red).

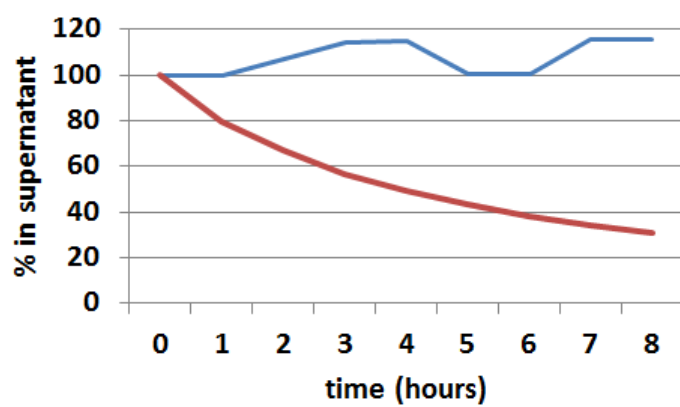

Supplement: c4ra08384a3.pdf [file c4ra08384a3.pdf]
